# Supplementary material for: Perceived bullying among Norwegian doctors in 1993, 2004 and 2014–2015: a study based on cross-sectional and repeated surveys
Source: PubMed Central journal article supplement — BMJ Open. 2018 Feb 3;8(2):e018161. doi: 10.1136/bmjopen-2017-018161 (PMC5829781; doi:10.1136/bmjopen-2017-018161), 2018-02-03
Supplement: bmjopen-2017-018161.draft_revisions.pdf [file bmjopen-2017-018161.draft_revisions.pdf]

# BMJ Open

BMJ Open is committed to open peer review. As part of this commitment we make the peer review history of every article we publish publicly available.

When an article is published we post the peer reviewers' comments and the authors' responses online. We also post the versions of the paper that were used during peer review. These are the versions that the peer review comments apply to.

The versions of the paper that follow are the versions that were submitted during the peer review process. They are not the versions of record or the final published versions. They should not be cited or distributed as the published version of this manuscript.

BMJ Open is an open access journal and the full, final, typeset and author-corrected version of record of the manuscript is available on our site with no access controls, subscription charges or pay-per-view fees (<http://bmjopen.bmj.com>).

If you have any questions on BMJ Open's open peer review process please email [editorial.bmjopen@bmj.com](mailto:editorial.bmjopen@bmj.com)

# BMJ Open

## Stable prevalence of workplace bullying among Norwegian doctors: A study based on national samples in 1993, 2004 and 2014-15

|                                 |                                                                                                                                |
|---------------------------------|--------------------------------------------------------------------------------------------------------------------------------|
| Journal:                        | <i>BMJ Open</i>                                                                                                                |
| Manuscript ID                   | bmjopen-2017-018161                                                                                                            |
| Article Type:                   | Research                                                                                                                       |
| Date Submitted by the Author:   | 09-Jun-2017                                                                                                                    |
| Complete List of Authors:       | Rosta, Judith; Institute for Studies of the Medical Profession, Aasland, Olaf; Institute for Studies of the Medical Profession |
| <b>Primary Subject Heading</b>: | Epidemiology                                                                                                                   |
| Secondary Subject Heading:      | Mental health                                                                                                                  |
| Keywords:                       | Norwegian doctors, workplace bullying, national samples                                                                        |
|                                 |                                                                                                                                |

SCHOLARONE™  
Manuscripts

1  
2  
3 Original investigation  
4  
5  
6

7 **Stable prevalence of workplace bullying among Norwegian doctors:**

8  
9 **A study based on national samples in 1993, 2004 and 2014-15**  
10  
11

12  
13 **Judith Rosta**, PhD, senior researcher  
14

15 **Olaf G. Aasland**, MD, MHA, senior researcher  
16  
17

18  
19 Institute for Studies of the Medical Profession, NMA, Akersgata 2, 0107 Oslo, Norway;  
20

21 E-Mail: [judith.rosta@legeforeningen.no](mailto:judith.rosta@legeforeningen.no)  
22  
23

24  
25  
26  
27 **Abstract:** 297 words  
28

29 **Main text:** 3,300 words  
30

31 **Number of tables:** 4  
32

33 **Number of Figure:** 1  
34  
35

36  
37 **Corresponding author**  
38

39 Name: Judith Rosta  
40

41 Institute: LEFO-Institute for Studies of the Medical Profession  
42

43 Street: Akersgata 2,  
44

45 Postal code: 0107  
46

47 City: Oslo  
48

49 Country: Norway  
50

51 Telephone: +47 23 10 90 62  
52

53 Fax: +47 23 10 90 60  
54

55 Email: [judith.rosta@legeforeningen.no](mailto:judith.rosta@legeforeningen.no)  
56  
57  
58  
59  
60

1  
2  
3 **Abstract:**

4 **Objectives:** To examine the trend in 12 months prevalence of subjection to bullying at work for  
5 doctors in different job categories and medical disciplines from 1993 to 2014-15, to describe the  
6 impact of personality dimensions on reporting bullying in 2004 and 2014-15 and to find work and  
7 health-related factors associated with being subjected to workplace bullying for doctors in 2014-15.

8 **Design:** Cross-sectional survey in 1993 and unbalanced cohort surveys in 2004 and 2014-15 based on  
9 postal questionnaires.

10 **Setting:** Norway.

11 **Participants:** National samples of 2,628 doctors (72.8%) in 1993, 1,004 (67%) doctors in 2004 and  
12 1,261 doctors (78.2%) in 2014-15.

13 **Outcome measure:** Being subjected to bullying at work from colleagues or superiors within the last  
14 year.

15 **Results:** The samples in 1993 (5.7%, 95% CI 4.8 to 6.6), in 2004 (7.3%, 5.4 to 9.2) and in 2014-15  
16 (7.0%, 4.5 to 8.5) showed no significant changes in being subjected to bullying at work. Neither were  
17 there any significant changes over time within different job positions or medical disciplines. Bullied  
18 doctors scored higher on the personality trait neuroticism, both in 2004 (4.1, 3.3 to 5.0 vs. 3.0, 2.7 to  
19 3.2) and in 2014-15 (4.4, 3.4 to 5.5 vs. 3.0, 2.8 to 3.2). In 2014-15, being bullied at work was  
20 significantly associated with female gender (OR 2.0, 95% CI 1.2 to 3.5), lower levels of job  
21 satisfaction (0.9, 0.9-0.9) and lower levels of self-rated health (very good 1, average or poor 2.3, 1.2 to  
22 4.3; good 3.5, 1.5 to 8.3), controlled for age and sickness absence days.

23 **Conclusions:** The fraction of doctors who experienced being bullied was stable over a 20-year period.  
24 Neuroticism may increase this experience. A detrimental effect of workplace bullying on doctors' self-  
reported health and job satisfaction was confirmed. Our findings call for increased awareness on  
bullying among doctors.

1  
2  
3 **1 Strengths and limitations of this study**  
4

5 2

6  
7 3 • The prevalence of being subjected to bullying at work for doctors in different job categories and  
8  
9 4 medical disciplines was stable from 1993 to 2014-15.

10 5

11  
12 6 • The representative data allow for generalisation to the whole doctors population in Norway.  
13  
14 7

15  
16  
17 8 • Analyses were based on self-reported data that is not easy to judge whether the respondents  
18  
19 9 overestimate or underestimate their experiences.  
20  
21  
22  
23  
24  
25  
26  
27  
28  
29  
30  
31  
32  
33  
34  
35  
36  
37  
38  
39  
40  
41  
42  
43  
44  
45  
46  
47  
48  
49  
50  
51  
52  
53  
54  
55  
56  
57  
58  
59  
60

## 1 INTRODUCTION

2 The negative effects of workplace bullying on both the individual and the organisational level are well  
3 documented. It is often associated with suboptimal health and poor job satisfaction, as well as frequent  
4 job change and increased absenteeism.<sup>1-3</sup> It is also shown that poor health and low job satisfaction of  
5 doctors may affect patient safety and treatment outcomes.<sup>4</sup> Despite these negative effects, work place  
6 bullying among doctors has not been well studied in Norway.

7  
8 International variations in levels of workplace bullying are large. On average, 5 % of the respondents  
9 in the 6<sup>th</sup> European Working Condition Survey 2015 comprising all the EU-28 countries reported  
10 being subjected to bullying or harassment during the last 12 months.<sup>5</sup> According to Statistics Norway,  
11 3.3 % of Norwegian employees had been bullied at work at least once a month, with no significant  
12 differences in age or gender. Between occupational groups, service-related occupations (waiters,  
13 craftspersons, military, police, health- and social care) experience bullying more than average.<sup>6,7</sup>

14  
15 A cross-sectional study based on 2004-05 data from university hospitals showed that 10.5 % of  
16 doctors in Trondheim (Norway), 12.7 % in Reykjavik (Island), 13.8 % in Stockholm (Sweden) and  
17 20.2 % in Padova (Italy) reported degrading experiences including bullying at workplace harassment  
18 during the previous six months.<sup>8</sup> Other cross-sectional studies in European countries,<sup>9-13</sup> USA<sup>14-16</sup> and  
19 Australia<sup>17</sup> suggest similar high levels of experienced bullying at work for diverse groups of doctors,  
20 ranging from 16 % to 76 % depending on definitions and methods of assessment.

21  
22 The perception of being bullied is linked to personality traits. Victims tend to be more neurotic and  
23 less agreeable, conscientious and extravert than non-victims (Glasø et al. 2007).<sup>1,18</sup> People who score  
24 high on neuroticism were found to be more reactive to stress and more likely to interpret ordinary  
25 situations as threatening.<sup>19</sup>

26

1  
2  
3 1 In Norway, many studies have addressed bullying in the workplace, including hospital staff<sup>20</sup> and  
4  
5 2 nurses,<sup>2</sup> but none have examined the experience of doctors based on nationwide representative dataset  
6  
7 3 over a 20-years period.  
8  
9 4

10  
11 5 Since 1993 the Institute for Studies of the Medical Profession (LEFO) has regularly surveyed a  
12  
13 6 representative sample of active doctors in Norway (legeforsk.org). The surveys in 1993, 2004 and  
14  
15 7 2014-15 included identical item on being subjected to workplace bullying. It is therefore possible to  
16  
17 8 reliably describe changes during this period.  
18  
19 9

20  
21 10 In this article we mainly focus on the possible changes in the prevalence of being subjected to  
22  
23 11 workplace bullying for Norwegian doctors in various types of job and for hospital doctors practising in  
24  
25 12 different medical disciplines in 1993, 2004 and 2014-15. We also describe the impact of two major  
26  
27 13 dimensions of personality introversion-extraversion and neuroticism on reporting bullying experience  
28  
29 14 in 2004 and 2014. In 2014-15 we investigate whether being bullied is associated with work- and  
30  
31 15 health related factors.  
32  
33 16

34  
35  
36  
37 17

## 38 18 **MATERIAL AND METHODS**

### 39 19 **Design and participants**

40  
41 20 In Norway, doctors' health and working conditions have been studied in an extensive research  
42  
43 21 program by Institute for Studies of the Medical Profession starting in 1992.  
44  
45 22

46  
47 23 In 1993, a random sample of 9,266 active doctors in Norway was invited to take part in a cross-  
48  
49 24 sectional postal survey of doctors' health, working conditions and quality of life. Each doctor  
50  
51 25 received four from a pool of 16 different questionnaires; one basic questionnaire was sent to all, and  
52  
53 26 the three others were randomly distributed according to a weighted system. The intention was to  
54  
55 27 achieve a random pattern of missing responses in the total database. See Aasland et al<sup>21</sup> for a detailed  
56  
57 28 description of this overlapping questionnaire design. The data used in this article are from a  
58  
59  
60

1  
2  
3 1 representative subsample of 3,608 doctors who received a questionnaire about organisation of work  
4  
5 2 and work environment including items on experienced bullying in the workplace.  
6  
7 3

8  
9 4 A randomly selected group of 2,000 doctors were invited to be included in a longitudinal study instead  
10  
11 5 of in the cross-sectional, and 1,272 agreed to participate.<sup>21</sup> Since 1994, this group has been followed  
12  
13 6 through biannual postal questionnaires, and retired doctors have gradually been replaced by younger  
14  
15 7 ones.<sup>22 23</sup> Both in 2004 (n=1,499) and 2014-15 (n=1,612) the questionnaires contained items on  
16  
17 8 bullying at the workplace.  
18  
19 9

## 10 **Variables**

### 11 *Response variable*

12 Being subjected to workplace bullying was assessed with the same question in 1993, 2004 and 2014-  
13  
14 15: "Have you been subjected to bullying or uncomfortable teasing (mobbing) from colleagues or  
15  
16 14 superiors during the last year?" There were five response categories: (1) no, (2) yes, up to a few times  
17  
18 15 a month, (3) yes, about once a week, (4) yes, a few times a week, and (5) yes, daily or almost daily.  
19  
20 16

### 17 *Effect variables*

18 Numerous associations with workplace bullying have been reported, for example poor mental or  
19  
20 19 physical health and poor working conditions. The present study includes the following items:  
21  
22 20

### 21 *Nine job categories:*

22 1: doctors in hospital management positions (medical superintendent, head of department, chief senior  
23  
24 23 consultant, head of unit, senior consultant, head of section)

25 24 2: senior hospital consultants

26 25 3: specialty registrars

27 26 4: general practitioners

28 27 5: specialists working in private practice  
29  
30  
31  
32  
33  
34  
35  
36  
37  
38  
39  
40  
41  
42  
43  
44  
45  
46  
47  
48  
49  
50  
51  
52  
53  
54  
55  
56  
57  
58  
59  
60



1  
2  
3 1 6: community medical officers (district medical officer, senior district medical, officer, nursing home  
4  
5 2 medical officer, visiting medical officer, doctor at infant welfare clinic, community general  
6  
7 3 practitioner)

8  
9 4 7: doctors in academia (professor, associate professor, research fellow, and researcher)

10  
11 5 8: doctors in administrative positions (county medical officer, medical advisor, chief medical officer)

12  
13 6 9: other key job categories

14  
15 7

16  
17 8 There are 45 approved *medical disciplines* in Norway. For the purpose of this study, the disciplines are  
18  
19 9 collapsed into five categories:

20  
21 10 1: general (internal) medicine disciplines (general practice, paediatrics, haematology, endocrinology,  
22  
23 11 gastroenterology, physical medicine and rehabilitation, geriatrics, cardiology, dermatology, internal  
24  
25 12 medicine, communicable diseases, respiratory medicine, neurology, oncology, nephrology,  
26  
27 13 rheumatology)

28  
29 14 2: surgical disciplines (anaesthesiology, paediatric surgery, cardiothoracic and endocrine surgery,  
30  
31 15 obstetrics and gynaecology, gastroenterological surgery, general surgery, vascular surgery,  
32  
33 16 maxillofacial surgery, neurosurgery, orthopaedic surgery, plastic surgery, thoracic surgery, urology,  
34  
35 17 otorhinolaryngology, ophthalmology)

36  
37 18 3: laboratory disciplines (immunology and transfusion medicine, clinical pharmacology, clinical  
38  
39 19 neurophysiology, medical biochemistry, medical genetics, medical microbiology, nuclear medicine,  
40  
41 20 pathology, radiology)

42  
43 21 4: psychiatry (psychiatry, child and adolescent psychiatry, substance abuse and addiction medicine,  
44  
45 22 community medicine)

46  
47 23 5: other

48  
49  
50 24

51  
52 25 *Self-rated health* was measured in 2014-15 by the question “In general, would you say your health is:  
53  
54 26 very good, good, average, poor”.

55  
56 27  
57  
58  
59  
60

1  
2  
3 1 *Sickness absence* was measured in 2014-15 with a single question: "How many days of sickness  
4 absence have you taken during the past 12 months?" The reported numbers of sickness absence days  
5 were split into four levels: 0 day, 1 to 3 days, 4 to 99 days, and 100 or more days.<sup>24</sup>  
6  
7  
8  
9 4

10 5 *Job satisfaction* was measured with the "Job Satisfaction Scale" of Warr, Cook and Wall.<sup>25</sup> It includes  
11 ten items that scored on a Likert scale from 1 (very dissatisfied) to 7 (very satisfied). The items were  
12 added together into a composite mean job satisfaction scale with possible values from 10 to 70.  
13  
14  
15  
16  
17 8

18  
19 9 Two personality dimensions, *extraversion – introversion* and *neuroticism*, were measured with the  
20 "Eysenck Personality Inventory". Each dimension is based on ten yes or no questions, giving a range  
21 from 0 to 10.<sup>26</sup> A subset of the original members of the Panel had completed the inventory in 2002.  
22  
23  
24  
25  
26  
27 12

28 13 Item on working within one of four *regional health authorities* ( North, Central, West and South-East)  
29 was included in 2014-15 (helseforetak.no). *Other background variables* were gender and age.  
30  
31  
32  
33  
34  
35  
36  
37  
38  
39  
40  
41  
42  
43  
44  
45  
46  
47  
48  
49  
50  
51  
52  
53  
54  
55  
56  
57  
58  
59  
60

## 16 **Analysis**

17 In this study, we look at the prevalence of being subjected to workplace bullying within last year  
18 among doctors in 1993, 2004 and 2014-15, based on self-reports. Statistically significant group  
19 differences are indicated by non-overlapping 95 % confidence intervals. Simultaneous effects are  
20 shown in multivariate logistic regression models. Units with missing data were excluded. Predictive  
21 Analytics Software Statistics 23 was used for the analyses.  
22  
23  
24  
25  
26  
27  
28  
29  
30  
31  
32  
33  
34  
35  
36  
37  
38  
39  
40  
41  
42  
43  
44  
45  
46  
47  
48  
49  
50  
51  
52  
53  
54  
55  
56  
57  
58  
59  
60

## 24 **RESULTS**

### 25 **Respondents**

26 The samples of the cross-sectional survey in 1993 and the cohort data from 2004 and 2014-15 were  
27 nearly representative of the total doctor work force in terms of age, gender and main job categories (as  
28 described in previous studies).<sup>21-23</sup>

1  
2  
3 1  
4  
5 2 The response rates were 72.8 % (2,628/3,608) in 1993, 67 % (1,004/1,499) in 2004 and 78.2 %  
6  
7 3 (1,261/1,612) in 2014-15. The numbers of respondents with data on all variables (being subjected to  
8  
9 4 bullying, gender, age, and job category) were 2,439 in 1993, 730 in 2004 and 1,079 in 2014-15. 485  
10  
11 5 doctors responded both in 2004 and 2014-15.

12  
13 6  
14  
15 7 Subsamples of the Panel members had completed the Eysenck Personality Inventory: 660 of 730 in  
16  
17 8 2004, 563 of 1,079 in 2014-15 and 443 of the 485 cohort members in 2004 and 2014-15.

18  
19 9  
20  
21 10 The proportion of females in our samples increased from 27.9 % (n=680) in 1993 to 31.5 % (n=230)  
22  
23 11 in 2004 and further to 43.1 % (n=465) in 2014-15. The mean age was 42.2 years (95 % CI 41.8-42.6)  
24  
25 12 in 1993, 54.3 years (95% CI 53.7-54.9) in 2004 and 48.5 years (95 % CI 47.9-49.2) in 2014-15, when  
26  
27 13 younger doctors had been included in the sample. The majority of respondents worked in the hospital  
28  
29 14 sector (data not shown).

30  
31 15  
32  
33 16 Among the 485 doctors who responded both in 2004 and 2014-15, 31.8 % (n=154) were females and  
34  
35 17 68.2 % (n=331) were males. The mean age was 46.6 years (95 % CI 45.9 to 47.3) in 2004 and 56.8  
36  
37 18 years (95 % CI 56.1 to 57.5) in 2014-15. In 2004 and 2014-15, about every second doctor worked in  
38  
39 19 hospital and every fourth doctors worked as GP and every fourth hold another job position.

#### 20 21 **Prevalence of bullying at work in 1993, 2004 and 2014-15**

22 Table 1 shows that the last 12 months prevalence of being subjected to bullying from colleagues or  
23  
24 23 superiors among all doctors stayed stable over the 20 year period. Being subjected to bullying at work  
25  
26 24 monthly or more was 5.7 % (95 % CI 4.8 to 6.6) in 1993, 7.3 % (5.4 to 9.2) in 2004 and 7.0 % (4.5 to  
27  
28 25 8.5) in 2014-15.

## 1 **Group differences**

2 Table 2 shows the last 12 months prevalence of bullying at work from colleagues or superiors over  
3 time by gender, age and main job positions among all doctors, and by medical disciplines among  
4 hospital doctors.

5  
6 At all three points in time the prevalence of becoming bullied was higher for senior hospital  
7 consultants and for doctors in hospital management position than for specialty registrars, GPs and  
8 specialist in private practice.

9  
10 The highest prevalence of being subjected to bullying at work was found among doctors in the surgery  
11 and laboratory medicine categories in 1993 and 2004, and in surgery and psychiatry in 2014-15.

12 Among hospital doctors in 2014-15, no significant differences in bullying at work were found across  
13 the four regional health authorities (data not shown).

14  
15 Males compared to females, and GPs compared with specialty registrars and senior hospital doctors  
16 reported significantly lower prevalence of experienced bullying in 1993. No significant differences  
17 were found in data from 2004 and 2014-15.

## 18 19 **Changes in responses in the cohort from 2004 to 2014-15**

20 Figure 1 illustrates how the responses on being subjected to bullying at work changed from 2004 to  
21 2014-15 among the 485 doctors who answered at both points in time. There was a non-significant  
22 decrease in the prevalence of being subjected to bullying monthly or more from 7.2 % (95 % CI 5.2 to  
23 9.9) in 2004 to 5.6 % (95 % CI 3.9 to 8.0) in 2014-15. At both points in time, 11 doctors (2.3 %)  
24 reported that they had been bullied at work monthly or more in the last year.

## 25 26 **Reporting bullying and personality dimensions**

27 Table 3 describes the mean scores with 95 % confidence intervals of two personality dimensions  
28 among Norwegian doctors with and without having experienced workplace bullying, adjusted for

1  
2  
3 1 gender and age. The introversion-extraversion dimension had no effect on reporting bullying at work,  
4  
5 2 while the scores for the neuroticism dimension was significantly higher in doctors who reported being  
6  
7 3 bullied at work.  
8  
9 4

10  
11 5 To further explore the effects of personality, age, and gender on experienced bullying, we performed  
12  
13 6 multivariate logistic regression analyses for each time point. Neuroticism was a significant predictor in  
14  
15 7 all models, in the cross-sectional samples from 2004 (OR 1.28, 95 % CI 1.13-1.44) and 2014-15 (1.24,  
16  
17 8 1.07-1.45), and in the cohort samples from 2004 (1.21, 1.05-1.40) and 2014-15 (1.30, 1.09-1.56).  
18  
19 9 Introversion-extraversion, age and gender showed no effect in these models (data not shown).  
20  
21 10

### 22 23 11 **Predictors of being subjected to bullying at work in 2014-15**

24  
25 12 Table 4 describes the distribution of possible effect variables, and summarizes the univariate and  
26  
27 13 multivariate analyses of the chosen variables on being subjected to bullying at work from colleagues  
28  
29 14 or superiors monthly or more within the last year among all doctors. Being female, having lower job  
30  
31 15 satisfaction and lower levels of self-rated health were significant univariate and multivariate  
32  
33 16 predictors.  
34  
35 17

## 36 37 18 **DISCUSSION**

### 38 39 19 **Main findings**

40  
41 20 Being subjected to workplace bullying remained stable for doctors in Norway over a 20-year period.  
42  
43 21 Neuroticism was positively associated with being bullied. Negative effects of workplace bullying on  
44  
45 22 doctors` self-reported health and job satisfaction were confirmed.  
46  
47 23

### 48 49 24 **Comparison with other studies**

50  
51 25 Differences in methodology limit direct cross-national comparisons. The selected studies in Table 4,  
52  
53 26 however, suggests less workplace bullying in our sample of Norwegian doctors. The prevalence of  
54  
55 27 being bullied was 6.5 % among our specialty registrars versus 48 % in residents/fellows in US and 13-  
56  
57 28 16 % in junior doctors in Germany, 11.3 % in our doctors in academia positions versus 42-58 % in  
58  
59  
60

1 doctor-researchers in the UK, 9.3 % among our surgeons versus 47 % in surgery trainees and  
2 consultants in Australia, 4 % among our GPs versus 30 % in GPs in Lithuania and 79 % in GPs in  
3 Canada.

4  
5 Having experienced bullying for Norwegian specialty registrars at all three time points was slightly  
6 lower than for senior hospital consultants and doctors in hospital management position. The opposite  
7 was observed among surgery trainees versus consultant surgeons in Australia, and among doctors in  
8 postgraduate position 1 versus levels 2-8 in hospital setting in the US, while no such differences were  
9 found in the UK.<sup>13 14 17</sup> While we found a higher prevalence of experienced bullying among Norwegian  
10 female doctors, and a fairly even distribution across age groups, other studies did not report such  
11 patterns.<sup>8 10 12-14</sup> However, the higher prevalence for doctors in surgery and academic positions is more  
12 consistent.<sup>9 13 17 27</sup>

13  
14 Our findings add to other Norwegian studies suggesting that workers in the health and social sectors  
15 are more at risk for reporting experienced bullying at work.<sup>6 7</sup> In our survey from 2014-15, 7 % of  
16 doctors experienced workplace bullying from colleagues or superiors a few times a months within the  
17 last 12 months, compared with 3 % in the general working population, and 6 % of nurses and 5 % of  
18 other workers in health care in 2013.<sup>6</sup> Doctors working in public sector hospitals reported more  
19 frequently workplace bullying than doctors working as GPs or as private practice specialist. This  
20 finding is consistent with a national survey suggesting a higher prevalence of work conflicts in public  
21 rather than private settings.<sup>28</sup> Previous Norwegian studies have also found that hospital doctors  
22 experienced more psychosocial work stress and are less satisfied with several aspects of job conditions  
23 than are GPs and private practice specialists.<sup>24 29</sup>

24  
25 In our cross-sectional and panel data, neuroticism was positively associated with reporting bullying  
26 experience, which is also found in several other studies.<sup>18</sup>

27

1  
2  
3 1 In our multivariate model, being subjected to bullying was associated with both lower level of self-  
4  
5 2 reported health and job satisfaction, but no with sickness absence. These results are in agreement with  
6  
7 3 recent meta-analyses on health- and job-related outcomes of bullying at work.<sup>1 30</sup>  
8  
9 4

### 5 **Explanation of results**

6 The work environmental hypothesis emphasise the importance of psychosocial work environment  
7 factors on workplace bullying. It implies that poor psychosocial working environment characterized  
8 by dissatisfaction, stress and unpredictable tasks can lead to conflicts, which in turn may develop into  
9 bullying.<sup>31</sup> Workplaces with high levels of conflicts between workers were found to also have  
10 increased risk for bullying.<sup>28</sup> Furthermore, victims of bullying are more dissatisfied with several  
11 psychosocial factors in the work environment compared with other workers.<sup>32</sup>  
12

13 Thus, variations in the psychosocial working conditions for doctors between countries and across  
14 occupational groups in Norway may account for variations in the prevalence of bullying.  
15

16 In the OECD study across 38 countries from 2016 on Better Life Index, the average level of life  
17 satisfaction was highest in Norway, suggesting strong social cohesion.<sup>33</sup> In the Eurofund study across  
18 28 countries from 2015 on working environment, there is a more positive picture of psychosocial and  
19 organizational working conditions in Norway, for example the scores for being "very satisfied or  
20 satisfied" with working conditions in the main job and being "always or almost the time" treated fairly  
21 at the workplace were higher in Norway (93 %; 94 %), compared with for example Germany (89 %;  
22 90 %), Sweden (85 %; 87 %), Italy (83 %; 84 %), UK (90 %; 85 %) and Lithuania (83 %; 76 %).<sup>5</sup> In  
23 other studies, doctors in Norway report lower stress levels,<sup>34</sup> better work-home balance, lower  
24 working time<sup>22 35</sup> and a higher level of job satisfaction,<sup>34 36-38</sup> suggesting a better work atmosphere in  
25 Norway, with lower physical burden, better collegial environment, more professional autonomy, more  
26 control over clinical work and shorter work hours.  
27

1  
2  
3 1 The present study documents no significant changes in the level of experienced bullying from 1993 to  
4  
5 2 2014-15 suggesting stable psychosocial working conditions for Norwegian doctors. Data from the last  
6  
7 3 decades show that also the weekly working time and the satisfaction with various aspects of working  
8  
9 4 conditions of doctors in Norway remained relative stable.<sup>22 23 39 40</sup>

10  
11 5  
12  
13 6 Our results suggest higher prevalence of workplace bullying for doctors than in other occupations in  
14  
15 7 Norway, which may partly be explained by the differences in cultural and psychosocial factors. A  
16  
17 8 study points out the importance of cultural factors such as the traditional hierarchical structures and  
18  
19 9 teaching methods in the medical profession that might influence the development of bullying.<sup>41</sup> In the  
20  
21 10 Living Condition Survey among Norwegian working population from 2013, doctors belonged to the  
22  
23 11 group of occupations that scored highest on the scales of psychosocial risk factors at work including  
24  
25 12 work-home unbalance, long working weeks, night works, frequent re-organizations at workplace and  
26  
27 13 high effort at work.<sup>6</sup> In a previous nation-wide survey, the medical and biological occupations scored  
28  
29 14 second highest at the scale of conflicts at work. About six of ten doctors reported conflicts both  
30  
31 15 between leader and employees and between employees.<sup>28</sup> Current studies underline the higher  
32  
33 16 workload and lower work-home balance in doctor work force compared with several occupations in  
34  
35 17 Norway.<sup>22 23</sup>

36  
37 18  
38  
39 19 Bullying is a subjective experience and can take many forms. Different tolerance levels against more  
40  
41 20 negative or clearer language are documented. In our sample, neuroticism was significant predictor of  
42  
43 21 reporting bullying experiences at work from colleagues or supervisors. It suggests that personality  
44  
45 22 traits, at least neuroticism, may have an impact on the subjective experience of workplace bullying.

#### 23 24 24 **Strengths and limitation**

25 25 The main strength of our study lies first and foremost in the near representative dataset, making the  
26  
27 26 results generalizable to the entire population of doctors in Norway.<sup>21-23</sup> Similarities in survey methods  
28  
29 27 and comparable items on being subjected to bullying at work are also strengths. The response rate was  
30  
31 28 between 67 % and 78 %, which is higher than for other surveys of the medical profession.<sup>22</sup> There is of



1 course the possibility that the doctors who did and did not respond are different in their characteristics.  
2 A methodological problem is that we only have self-reported and therefore subjective data, which  
3 however is considered a plausible methodology.<sup>6,7</sup> Other specific elements in workplace bullying like  
4 how it occurred (verbal or written by e-post or social media), who the perpetrators were (superiors,  
5 doctor colleagues, other personal, patients, relatives or friends of patients) or how long the bullying  
6 lasted might be also useful information, but was not obtainable in the present study.

### 7 8 **Policy implications**

9 Specific attention should be paid to doctors in hospital management position, senior hospital  
10 consultants and doctors in academic position, who run an increased risk of being bullied. More  
11 awareness about bullying in medical school and specialist training is clearly needed.

12

1  
2  
3 1 **DECLARATIONS**  
4  
5 2

6  
7 3 **Acknowledgements** The authors wish to thank all doctors who have supported this study by  
8  
9 4 participating in the survey.  
10  
11 5

12  
13 6 **Contributors** JR and OGA designed the study. JR undertook the literature review, did the statistical  
14  
15 7 analysis and wrote the first draft. OGA made critical revisions. Both authors had full access to all of  
16  
17 8 the data (including statistical reports and tables) and are jointly responsible for the integrity of the data  
18  
19 9 and the accuracy of the data analysis.  
20  
21 10

22  
23 11 **Funding** This research received no specific grant from any funding agency in the public,  
24  
25 12 commercial, or not-for-profit sectors.  
26  
27 13

28  
29 14 **Competing interest** None declared.  
30  
31 15

32  
33 16 **Ethics approval** According to the Regional Committee for Medical Research Ethics, the study based  
34  
35 17 on “Norwegian Physician Survey - A bi-annual prospective questionnaire survey to a representative  
36  
37 18 sample of Norwegian physicians” is exempt from review in Norway, cf. §§ 4 of The Act. The project  
38  
39 19 can be implemented without the approval by the Regional Committee for Medical Research Ethics  
40  
41 20 (IRB 0000 1870). Additionally, approval for data protection of the bi-annual prospective survey  
42  
43 21 among Norwegian doctors was obtained from the Norwegian Social Science Data Service (Reference  
44  
45 22 19521).  
46  
47 23

48  
49  
50 24 **Data sharing statement** The authors may be able to provide aggregated data on which the analysis is  
51  
52 25 based, on request. No additional data available.  
53  
54 26

1  
2  
3 **Table 1.**      **The 12 months prevalence of being subjected to workplace bullying from**  
4  
5                      **colleagues or superiors for Norwegian doctors in 1993, 2004 and 2014-15**  
6  
7  
8

9  
10  
11  
12  
13  
14  
15  
16  
17  
18  
19  
20  
21  
22  
23  
24  
25  
26  
27  
28  
29  
30  
31  
32  
33  
34  
35  
36  
37  
38  
39  
40  
41  
42  
43  
44  
45  
46  
47  
48  
49  
50  
51  
52  
53  
54  
55  
56  
57  
58  
59  
60

|                                | <b>1993</b>  | <b>2004</b> | <b>2014-15</b> |
|--------------------------------|--------------|-------------|----------------|
|                                | % (n)        | % (n)       | % (n)          |
| No                             | 94.3 (2,300) | 92.7 (677)  | 93.0 (1,004)   |
| Yes, until a few times a month | 4.5 (109)    | 5.2 (38)    | 5.5 (59)       |
| Yes, about ones a week         | 0.6 (15)     | 1.0 (7)     | 0.6 (7)        |
| Yes, about few times a week    | 0.3 (8)      | 0.8 (6)     | 0.6 (7)        |
| Yes, daily or almost daily     | 0.3 (7)      | 0.3 (2)     | 0.3 (3)        |

4  
5

**Table 2. Group differences in the 12 months prevalence of being subjected to workplace bullying from colleagues or superiors a few times a month or more for Norwegian doctors in 1993, 2004 and 2014-15**

|                                          | 1993  |                 | 2004 |                 | 2014-15 |                  |
|------------------------------------------|-------|-----------------|------|-----------------|---------|------------------|
|                                          | n     | % (95 % CI)     | n    | % (95 % CI)     | n       | % (95 % CI)      |
| <b>ALL DOCTORS</b>                       | 2,439 |                 | 730  |                 | 1,080   |                  |
| <b>Gender</b>                            |       |                 |      |                 |         |                  |
| Females                                  | 57    | 8.3 (6.5-10.7)  | 11   | 4.8 (3.0-8.4)   | 43      | 9.2 (6.6-11.8)   |
| Males                                    | 82    | 4.7 (3.8-5.8)   | 42   | 8.4 (6.3-11.2)  | 33      | 5.4 (3.6-7.2)    |
| <b>Age by years</b>                      |       |                 |      |                 |         |                  |
| 25 to 35                                 | 31    | 5.6 (3.9-7.8)   | 0    | 0.0 (-)         | 11      | 6.7 (3.8-11.6)   |
| 36 to 45                                 | 56    | 5.8 (4.5-7.5)   | 11   | 10.9 (6.2-18.5) | 25      | 8.5 (5.8-12.3)   |
| 46 to 55                                 | 38    | 6.0 (4.4-8.2)   | 16   | 7.7 (4.8-12.1)  | 20      | 8.1 (5.3-12.1)   |
| 56 to 65                                 | 13    | 5.3 (3.1-8.9)   | 20   | 5.8 (3.8-8.9)   | 19      | 6.1 (4.0-9.4)    |
| 66 to 69                                 | 1     | 2.1 (0.4-11.1)  | 6    | 10.2 (4.7-20.5) | 1       | 1.6 (0.3-8.3)    |
| <b>Job positions</b>                     |       |                 |      |                 |         |                  |
| Specialty registrars                     | 67    | 7.2 (5.7-9.1)   | 6    | 5.2 (2.4-10.9)  | 11      | 6.5 (2.8-10.2)   |
| Senior hospital consultants              | 11    | 14.3 (8.2-23.8) | 19   | 10.2 (6.6-15.4) | 34      | 9.7 (6.6-12.8)   |
| Doctors in hospital management positions | 1     | 11.1 (2.0-43.5) | 9    | 9.6 (5.1-17.2)  | 10      | 9.7 (4.0-15.4)   |
| Community medical officers               | 27    | 5.7 (4.0-8.2)   | 2    | 6.5 (1.8-20.7)  | 0       | 0.0 (-)          |
| General practitioners                    | 6     | 2.4 (1.1-5.2)   | 8    | 4.3 (2.2-8.3)   | 9       | 4.0 (1.5-6.6)    |
| Specialists in private practice          | 1     | 9.1 (1.6-37.7)  | 2    | 4.3 (1.2-14.2)  | 0       | 0.0 (-)          |
| Doctors in academia positions            | 7     | 7.3 (3.6-14.3)  | 3    | 11.5 (4.0-29.0) | 7       | 11.3 (3.4-19.2)  |
| Doctors in administrative positions      | 1     | 16.7 (3.0-56.4) | 1    | 11.1 (2.0-43.5) | 2       | 7.1 (-2.4-16.6)  |
| Other                                    | 18    | 3.0 (1.9-4.8)   | 3    | 7.9 (2.7-20.8)  | 3       | 8.8 (-0.7-18.3)  |
| <b>HOSPITAL DOCTORS<sup>(a)</sup></b>    | 1,014 |                 | 395  |                 | 618     |                  |
| Internal medicine                        | 15    | 4.9 (3.0-8.0)   | 11   | 7.5 (4.2-12.9)  | 18      | 6.9 (4.4-10.7)   |
| Laboratory medicine                      | 5     | 7.9 (3.4-17.3)  | 5    | 8.9 (3.9-19.3)  | 6       | 8.5 (3.9-17.2)   |
| Surgery                                  | 25    | 11.1 (7.6-15.9) | 13   | 11.7 (7.0-19.0) | 15      | 9.3 (5.7-14.8)   |
| Psychiatry                               | 6     | 5.2 (2.4-10.8)  | 4    | 5.4 (2.1-13.1)  | 12      | 10.3 (6.0-17.2)  |
| Other                                    | 28    | 9.2 (6.5-13.0)  | 1    | 14.3 (2.6-51.3) | 3       | 30.0 (10.8-60.3) |
| Total                                    | 79    | 7.8 (6.3-9.6)   | 34   | 8.6 (6.2-11.8)  | 51      | 8.4 (6.4-10.8)   |

(a) The group of hospital doctors includes specialty registrars, senior hospital consultants and doctors in hospital management positions.

1  
2  
3 **Table 3.** **General linear model of mean scores of personality dimensions with 95 %**  
4 **confidence intervals among Norwegian doctors with and without experienced**  
5 **workplace bullying from colleagues or superiors a few times a month or more**  
6 **(adjusted for gender and age)**  
7  
8  
9  
10  
11  
12  
13  
14  
15  
16  
17  
18  
19  
20  
21  
22  
23  
24  
25  
26  
27  
28  
29  
30  
31  
32  
33  
34  
35  
36  
37  
38  
39  
40  
41  
42  
43  
44  
45  
46  
47  
48  
49  
50  
51  
52  
53  
54  
55  
56  
57  
58  
59  
60

|                                     | Being subjected to bullying at work |                  |     |                  |
|-------------------------------------|-------------------------------------|------------------|-----|------------------|
|                                     | no                                  |                  | yes |                  |
|                                     | n                                   | mean (95 % CI)   | n   | mean (95 % CI)   |
| <b>Cross-sectional data 2004</b>    |                                     |                  |     |                  |
| Extroversion – introversion         | 614                                 | 6.27 (6.08-6.47) | 46  | 6.41 (5.69-7.14) |
| Neuroticism                         | 614                                 | 2.96 (2.76-3.15) | 46  | 4.40 (3.69-5.12) |
| <b>Cross-sectional data 2014-15</b> |                                     |                  |     |                  |
| Extroversion – introversion         | 532                                 | 6.46 (6.25-6.66) | 31  | 7.00 (6.13-7.86) |
| Neuroticism                         | 532                                 | 2.97 (2.77-3.17) | 31  | 4.05 (3.19-4.90) |
| <b>Cohort data 2004</b>             |                                     |                  |     |                  |
| Extroversion – introversion         | 421                                 | 6.40 (6.16-6.37) | 22  | 6.30 (5.54-7.14) |
| Neuroticism                         | 421                                 | 2.97 (2.73-3.21) | 22  | 4.14 (3.29-5.00) |
| <b>Cohort data 2014-15</b>          |                                     |                  |     |                  |
| Extroversion – introversion         | 421                                 | 6.37 (6.13-6.60) | 22  | 6.88 (5.86-7.91) |
| Neuroticism                         | 421                                 | 2.99 (2.75-3.22) | 22  | 4.42 (3.38-5.45) |

1 **Table 3. Univariate analyses and logistic regression model on being subjected to bullying**  
 2 **at work from colleagues or superiors at least a few times a month as response**  
 3 **variable among all doctors in 2014-15 (n=1,053)**  
 4

|                                                         | All<br>% (n) | Univariate analyses on |              |         | Logistic regression model |                       |         |
|---------------------------------------------------------|--------------|------------------------|--------------|---------|---------------------------|-----------------------|---------|
|                                                         |              | No<br>% (n)            | Yes<br>% (n) | P-value | Exp(B)                    | 95 % C.I.<br>for ExpB | P-value |
| <b>Gender</b>                                           |              |                        |              |         |                           |                       |         |
| Male                                                    | 57.6 (607)   | 94.9 (576)             | 5.1 (31)     | 0.009   | 1                         |                       |         |
| Female                                                  | 42.4 (446)   | 90.6 (404)             | 9.4 (42)     |         | 2.02                      | 1.18-3.47             | 0.010   |
| <b>Age by years (mean)</b>                              | 49.0 (1.053) | 49.2 (980)             | 47.0 (73)    | 0.112   | 0.99                      | 0.97-1.02             | 0.625   |
| <b>Job satisfaction (mean,<br/>range from 10 to 70)</b> | 53.0 (1.053) | 53.6 (980)             | 44.9 (73)    | <0.000  | 0.92                      | 0.90-0.94             | <0.000  |
| <b>Self-rated health</b>                                |              |                        |              |         |                           |                       |         |
| Very good                                               | 44.3 (467)   | 96.6 (451)             | 3.4 (16)     | <0.000  | 1                         | -                     | 0.010   |
| Good                                                    | 45.9 (483)   | 91.7 (443)             | 8.3 (40)     |         | 3.50                      | 1.49-8.25             | 0.004   |
| Average or poor <sup>(a)</sup>                          | 9.8 (103)    | 83.5 (86)              | 16.5 (17)    |         | 2.29                      | 1.21-4.33             | 0.011   |
| <b>Sickness absence</b>                                 |              |                        |              |         |                           |                       |         |
| 0 day                                                   | 46.6 (491)   | 95.1(467)              | 4.9 (24)     | 0.053   | 1                         | -                     | 0.967   |
| 1 to 3 days                                             | 28.2 (297)   | 92.6 (275)             | 7.4 (22)     |         | 1.17                      | 0.62-2.22             | 0.629   |
| 4 to 99 days                                            | 23.5 (247)   | 89.9 (222)             | 10.1 (25)    |         | 1.12                      | 0.57-2.18             | 0.744   |
| 100 days or more                                        | 1.7 (18)     | 88.9 (16)              | 11.1 (2)     |         | 0.98                      | 0.18-5.28             | 0.977   |

5  
 6 (a) Categories of self-rated health "average" and "poor" collapsed into "average or poor", because of  
 7 very low response of "poor" (n=1).  
 8  
 9

**Table 4. Prevalence of being subjected to bullying or mobbing at work among doctors in selected countries**

| Country                                                                                       | Survey year          | Sample size                                              | Sample                                                   | Terminology                                                                                                                                                                                                                                                                                           | % of outcome                 |
|-----------------------------------------------------------------------------------------------|----------------------|----------------------------------------------------------|----------------------------------------------------------|-------------------------------------------------------------------------------------------------------------------------------------------------------------------------------------------------------------------------------------------------------------------------------------------------------|------------------------------|
| Norway (Trondheim)<br>Island (Reykjavik)<br>Sweden (Stockholm)<br>Italy (Padova) <sup>8</sup> | 2004-05              | 377 of 689<br>254 of 531<br>1,075 of 1,827<br>372 of 900 | Doctors from university hospitals                        | Presenting definition on degrading experiences including bullying, followed by a single item regarding subsection to degrading experiences or harassment at the workplace during the last six months with response alternatives: yes, no.                                                             | 10.5<br>12.7<br>13.8<br>20.2 |
| UK <sup>13</sup>                                                                              | -                    | 594 of 1,000                                             | Junior doctors                                           | (a) Presenting definition on bullying, followed by a single item regarding subsection to bullying in the past year with response alternatives: yes, no.<br>(b) Scale with 21 items on bullying behaviors from peers, senior staff or managers in the past 12 months. One of more bullying behaviors:  | 37.0<br>84.0                 |
| UK <sup>9</sup>                                                                               | -                    | 259                                                      | Doctors undertaken research                              | Items regarding experiencing of four categories of bullying behavior:<br>-treat to professional status:<br>-threat to personal standing:<br>-isolation:<br>-enforced overwork:                                                                                                                        | 43.0<br>41.7<br>74.9<br>57.9 |
| Germany <sup>12</sup>                                                                         | 2004<br>2005<br>2007 | 507 of 1,000                                             | Junior hospital doctors in 2rd and 3rd year of residency | Presenting definition on bullying, followed by a single item regarding subsection to bullying in the past year with response alternatives: yes, no.                                                                                                                                                   | 12.9<br>14.9<br>15.9         |
| Bosnia and Herzegovina <sup>10</sup>                                                          | 2004-05              | 534 of 700                                               | Contracted doctors in hospital and health centers        | Items regarding five major categories of mobbing behavior in the past 12 months: treat to professional status, treat to personal integrity, isolation, overwork, destabilization.<br>One of more types of mobbing behaviors:                                                                          | 76.0                         |
| Lithuania <sup>11</sup>                                                                       | -                    | 324 of 362                                               | Family physicians                                        | Single item regarding the frequency of experienced bullying during the last 6 months with response alternatives: no, occasional, severe (weekly and more frequent).                                                                                                                                   | 30.3                         |
| Canada <sup>16</sup>                                                                          | 2008-09              | 774 of 3,802                                             | Family physicians                                        | Items regarding 14 different types of abusive encounters in the past year with response alternatives: from never to very often on 5-point Likert scale.<br>Bullying at least ones:                                                                                                                    | 78.9                         |
| US <sup>14</sup>                                                                              | 2015                 | 1,791 of 2,158                                           | Residents and fellows                                    | (a) 20 items on bullying behavior with frequency scale in the past year.<br>(b) Presenting definition on bullying, followed by a single item regarding subsection to bullying in the past 12 months from peers, attendings, nurses, ancillary, staff or patients with response alternatives: yes, no. | 3.0-44.0<br>48.0             |
| Australia <sup>17</sup>                                                                       | 2012                 | 370 of 1,084                                             | General surgery trainees and consultant surgeons         | Presenting definition on bullying, followed by a single item regarding the frequency of experienced bullying in the past 12 months with response alternatives: never, now and then, monthly, weekly, daily.                                                                                           | 47.0                         |

## REFERENCES

1. Birkeland Nielsen M, Magerøy N, Gjerstad J, et al. Workplace bullying and subsequent health problems. *Tidsskrift for Den norske legeforening* 2014;134(12):1233-8.
2. Reknes I, Pallesen S, Magerøy N, et al. Exposure to bullying behaviors as a predictor of mental health problems among Norwegian nurses: results from the prospective SUSHH-survey. *Int J Nurs Stud* 2014;51(3):479-87.
3. Ariza-Montes A, Muniz NM, Montero-Simó MJ, et al. Workplace bullying among healthcare workers. *Int J Environ Res Public Health* 2013;10(8):3121-39.
4. Wallace JE, Lemaire JB, Ghali WA. Physician wellness: a missing quality indicator. *Lancet* 2009;374(9702):1714-21.
5. Eurofound. Sixth European Working Conditions Survey: 2015. Luxembourg: Publications Office of the European Union, 2016.
6. SSB. Working environment, survey on living conditions 2013. <http://www.ssb.no/en/arbeid-og-lonn/statistikker/arbmiljo/hvert-3-aar/2014-07-03>. (accessed 23.11.2016).
7. Aagestad C, Tynes T, Sterud T, et al. Faktabok om arbeidsmiljø og helse Oslo: STAMI-rapport, 2015.
8. Andersen GR, Aasland OG, Fridner A, et al. Harassment among university hospital physicians in four European cities. Results from a cross-sectional study in Norway, Sweden, Iceland and Italy (the HOUPE study). *Work* 2010;37(1):99-110.
9. Stebbing J, Mandalia S, Portsmouth S, et al. A questionnaire survey of stress and bullying in doctors undertaking research. *Postgraduate Medical Journal* 2004;80:93-6.
10. Pranjic N, Males-Bilić L, Beganlić A, et al. Mobbing, stress, and work ability index among physicians in Bosnia and Herzegovina: survey study. *Croat Med J* 2006;47(5):750-8.
11. Malinauskiene V, Einarsen S. Workplace bullying and post-traumatic stress symptoms among family physicians in Lithuania: an occupation and region specific approach. *Int J Occup Med Environ Health* 2014;27(6):919-32.
12. Loerbroks A, Weigl M, Li J, et al. Workplace bullying and depressive symptoms: a prospective study among junior physicians in Germany. *J Psychosom Res* 2015;78(2):168-72.
13. Quine L. Workplace bullying in junior doctors: questionnaire survey. *BMJ* 2002(324):878-9.
14. Chadaga A, Villines D., Krikorian A. Bullying in the American Graduate Medical Education System: A National Cross-Sectional Survey. *PLoS One* 2016;11(3):e0150246.
15. Rouse L, Gallagher-Garza S., Gebhard RE., et al. Workplace Bullying Among Family Physicians: A Gender Focused Study. *J Womens Health (Larchmt)* 2016(9):882-8.
16. Miedema B, Hamilton R, Lambert-Lanning A, et al. Prevalence of abusive encounters in the workplace of family physicians: a minor, major, or severe problem? *Can Fam Physician* 2010;56(3):e101-8.
17. Ling M, Young C, Shepherd H, et al. Workplace Bullying in Surgery. *World J Surg* 2016;40(11):2560-66.
18. Nielsen MB, Knardahl S. Is workplace bullying related to the personality traits of victims? A two-year prospective study. *Work & Stress* 2015;29(2):128-49.
19. Tyssen R, Dolatowski FC, Rovik JO, et al. Personality traits and types predict medical school stress: a six-year longitudinal and nationwide study. *Medical Education* 2007;41(8):781-7.



- 1
- 2
- 3 20. Eriksen G, Nygren I, Floyd Webster R. Bullying Among Hospital Staff : Use of
- 4 Psychometric Triage to Identify Intervention Priorities. *E-Journal of Applied*
- 5 *Psychology* 2011;17(2):26-31.
- 6 21. Aasland OG, Olff M, Falkum E, et al. Health complaints and job stress in Norwegian
- 7 physicians: the use of an overlapping questionnaire design. *Social Science & Medicine*
- 8 1997;45(11):1615-29.
- 9 22. Rosta J, Aasland OG. Weekly working hours for Norwegian hospital doctors since 1994
- 10 with special attention to postgraduate training, work-home balance and the European
- 11 Working Time Directive: a panel study. *BMJ Open* 2014;4(10).
- 12 23. Rosta J., Aasland OG. Doctors' working hours and time spent on patient care in the period
- 13 1994 - 2014. *Tidsskrift for Den norske legeforening* 2016;136(16):1355-9.
- 14 24. Rosta J, Tellnes G, Aasland OG. Differences in sickness absence between self-employed
- 15 and employed Doctors: a cross-sectional study on National sample of Norwegian
- 16 Doctors in 2010. *Health Services Research* 2014;49(1):1-8.
- 17 25. Warr P, Cook J, Wall T. Scales for the measurement of some work attitudes and aspects
- 18 of psychological well-being. *Journal of Occupational Psychology* 1979;52(2):129-48.
- 19 26. Eysenck HJ, Eysenck SBG. The Eysenck Personality Inventory. London: University of
- 20 London Press 1964.
- 21 27. Cassell M. Bullying in Academe: Prevalent, Significant, And Incessant. *Contemporary*
- 22 *Issues In Education Research* 2011;4(5):33-44.
- 23 28. Normann T, Rønning E. Konflikter, mobbing, trakassering og vold i arbeidslivet. .
- 24 *Samfunnsspeilet* 2007;4:62-71.
- 25 29. Aasland OG, Rosta J, Nylenna M. Healthcare reforms and job satisfaction among doctors
- 26 in Norway. *Scand J Public Health* 2010;38.
- 27 30. Nielsen MB, Einarsen S. Outcomes of exposure to workplace bullying: A meta-analytic
- 28 review. *Work & Stress* 2012;26(4):309-32.
- 29 31. Hauge L, Skogstad A, Einarsen S. Relationships between stressful work environments and
- 30 bullying: Results of a large representative study. *Work and stress* 2007;21(3):220-42.
- 31 32. Einarsen S, Glasø L, Birkeland Nielsen M. Mobbing i arbeidslivet: En litteraturoversikt
- 32 [Bullying in working life: a literature review]. *Tidsskrift for Norsk psykologforening*
- 33 2008;45(3):308-17.
- 34 33. OECD. Better Life Index 2016: Life satisfaction 2016.
- 35 <http://www.oecdbetterlifeindex.org/topics/life-satisfaction/>. (accessed 5.6.2017).
- 36 34. Voltmer E, Rosta J, Siegrist J, et al. Job stress and job satisfaction of physicians in private
- 37 practice: comparison of German and Norwegian physicians. *International Archives of*
- 38 *Occupational and Environmental Health* 2012;85(7):819-28.
- 39 35. Rosta J, Aasland OG. Work hours and self rated health of hospital doctors in Norway and
- 40 Germany. A comparative study on national samples. *BMC Health Services Research*
- 41 2011;11:40.
- 42 36. Rosta J, Nylenna M, Aasland OG. Job satisfaction among hospital doctors in Norway and
- 43 Germany. A comparative study on national samples. *Scandinavian Journal of Public*
- 44 *Health* 2009;37(5):503-8.
- 45 37. Tyssen R, Palmer KS, Solberg IB, et al. Physicians' perceptions of quality of care,
- 46 professional autonomy, and job satisfaction in Canada, Norway, and the United States.
- 47 *BMC Health Services Research* 2013;13(1):516.
- 48 38. Solberg IB, Tomasson K, Aasland O, et al. Cross-national comparison of job satisfaction
- 49 in doctors during economic recession. *Occup Med (Lond)* 2014;64(8):595-600.
- 50 39. Aasland OG, Rosta J, Nylenna M. Healthcare reforms and job satisfaction among doctors
- 51 in Norway. *Scandinavian Journal of Public Health* 2010;38(3):253-8.
- 52
- 53
- 54
- 55
- 56
- 57
- 58
- 59
- 60

- 1  
2  
3 40. Rosta J, Aasland O, Nylenna M. Changes in subjective well-being among Norwegian  
4 doctors from 2002 to 2012: a panel study. *European Journal of Public Health*  
5 2014(supplement 1):90.  
6 41. Hoosen I, Callaghan R. A survey of workplace bullying of psychiatric trainees in the West  
7 Midlands. *Psychiatric Bulletin* 2004;28:225-27.  
8  
9  
10  
11  
12  
13  
14  
15  
16  
17  
18  
19  
20  
21  
22  
23  
24  
25  
26  
27  
28  
29  
30  
31  
32  
33  
34  
35  
36  
37  
38  
39  
40  
41  
42  
43  
44  
45  
46  
47  
48  
49  
50  
51  
52  
53  
54  
55  
56  
57  
58  
59  
60

For peer review only

1  
2  
3  
4  
5  
6  
7  
8  
9  
10  
11  
12  
13  
14  
15  
16  
17  
18  
19  
20  
21  
22  
23  
24  
25  
26  
27  
28  
29  
30  
31  
32  
33  
34  
35  
36  
37  
38  
39  
40  
41  
42  
43

Figure 1. Change in responses for being subjected to bullying at work from 2004 to 2014-15 (n=485).

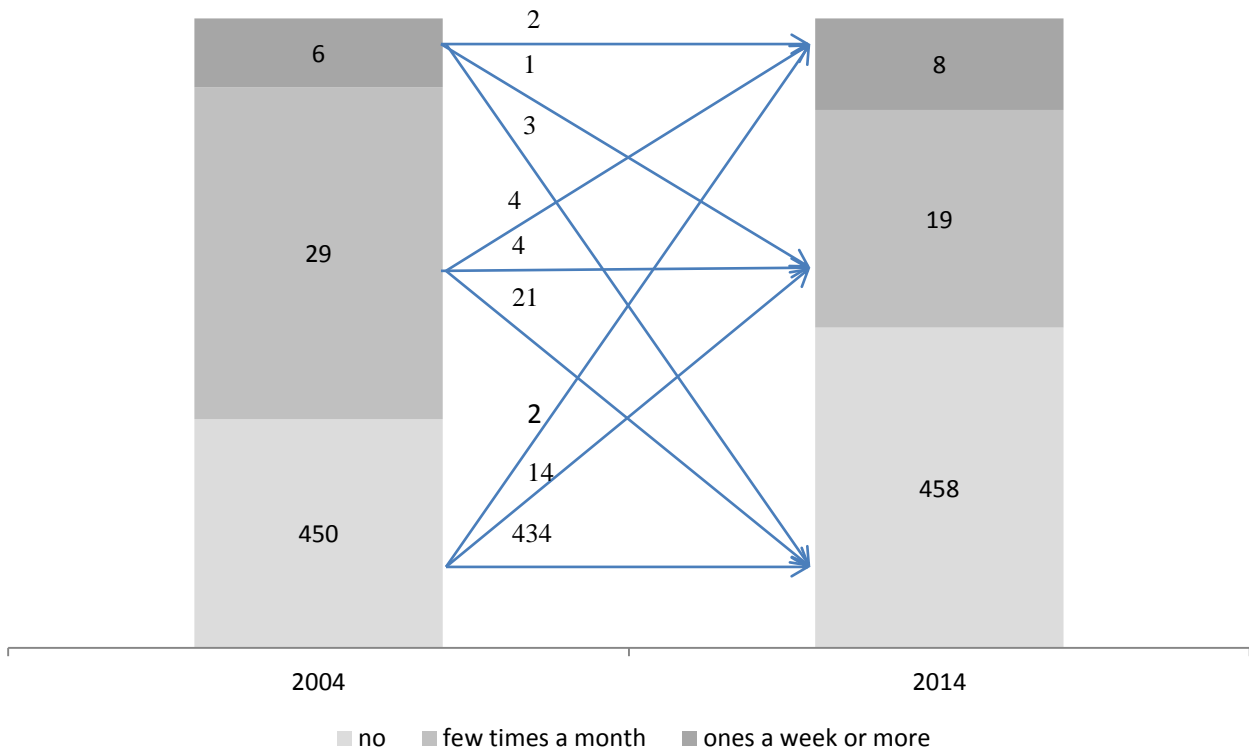

**STROBE 2007 (v4) checklist of items to be included in reports of observational studies in epidemiology\***  
**Checklist for cohort, case-control, and cross-sectional studies (combined)**

| Section/Topic             | Item # | Recommendation                                                                                                                                                                                                                                                                                                                                                                                                                                                         | Reported on page # |
|---------------------------|--------|------------------------------------------------------------------------------------------------------------------------------------------------------------------------------------------------------------------------------------------------------------------------------------------------------------------------------------------------------------------------------------------------------------------------------------------------------------------------|--------------------|
| Title and abstract        | 1      | (a) Indicate the study's design with a commonly used term in the title or the abstract                                                                                                                                                                                                                                                                                                                                                                                 | 1                  |
|                           |        | (b) Provide in the abstract an informative and balanced summary of what was done and what was found                                                                                                                                                                                                                                                                                                                                                                    | 2                  |
| <b>Introduction</b>       |        |                                                                                                                                                                                                                                                                                                                                                                                                                                                                        |                    |
| Background/rationale      | 2      | Explain the scientific background and rationale for the investigation being reported                                                                                                                                                                                                                                                                                                                                                                                   | 4-5                |
| Objectives                | 3      | State specific objectives, including any pre-specified hypotheses                                                                                                                                                                                                                                                                                                                                                                                                      | 5                  |
| <b>Methods</b>            |        |                                                                                                                                                                                                                                                                                                                                                                                                                                                                        |                    |
| Study design              | 4      | Present key elements of study design early in the paper                                                                                                                                                                                                                                                                                                                                                                                                                | 5                  |
| Setting                   | 5      | Describe the setting, locations, and relevant dates, including periods of recruitment, exposure, follow-up, and data collection                                                                                                                                                                                                                                                                                                                                        | 5-6                |
| Participants              | 6      | (a) <i>Cohort study</i> —Give the eligibility criteria, and the sources and methods of selection of participants. Describe methods of follow-up<br><i>Case-control study</i> —Give the eligibility criteria, and the sources and methods of case ascertainment and control selection. Give the rationale for the choice of cases and controls<br><i>Cross-sectional study</i> —Give the eligibility criteria, and the sources and methods of selection of participants | 5-6                |
|                           |        | (b) <i>Cohort study</i> —For matched studies, give matching criteria and number of exposed and unexposed<br><i>Case-control study</i> —For matched studies, give matching criteria and the number of controls per case                                                                                                                                                                                                                                                 |                    |
| Variables                 | 7      | Clearly define all outcomes, exposures, predictors, potential confounders, and effect modifiers. Give diagnostic criteria, if applicable                                                                                                                                                                                                                                                                                                                               | 6-8                |
| Data sources/ measurement | 8*     | For each variable of interest, give sources of data and details of methods of assessment (measurement). Describe comparability of assessment methods if there is more than one group                                                                                                                                                                                                                                                                                   | 8                  |
| Bias                      | 9      | Describe any efforts to address potential sources of bias                                                                                                                                                                                                                                                                                                                                                                                                              | 5-6                |
| Study size                | 10     | Explain how the study size was arrived at                                                                                                                                                                                                                                                                                                                                                                                                                              | 5-6                |
| Quantitative variables    | 11     | Explain how quantitative variables were handled in the analyses. If applicable, describe which groupings were chosen and why                                                                                                                                                                                                                                                                                                                                           | 6-8                |
| Statistical methods       | 12     | (a) Describe all statistical methods, including those used to control for confounding                                                                                                                                                                                                                                                                                                                                                                                  | 8                  |
|                           |        | (b) Describe any methods used to examine subgroups and interactions                                                                                                                                                                                                                                                                                                                                                                                                    | -                  |
|                           |        | (c) Explain how missing data were addressed                                                                                                                                                                                                                                                                                                                                                                                                                            | 8                  |
|                           |        | (d) <i>Cohort study</i> —If applicable, explain how loss to follow-up was addressed<br><i>Case-control study</i> —If applicable, explain how matching of cases and controls was addressed                                                                                                                                                                                                                                                                              | -                  |

|                          |     |                                                                                                                                                                                                              |       |
|--------------------------|-----|--------------------------------------------------------------------------------------------------------------------------------------------------------------------------------------------------------------|-------|
|                          |     | <i>Cross-sectional study</i> —If applicable, describe analytical methods taking account of sampling strategy                                                                                                 |       |
|                          |     | (e) Describe any sensitivity analyses                                                                                                                                                                        | -     |
| <b>Results</b>           |     |                                                                                                                                                                                                              |       |
| Participants             | 13* | (a) Report numbers of individuals at each stage of study—eg numbers potentially eligible, examined for eligibility, confirmed eligible, included in the study, completing follow-up, and analysed            | 8-9   |
|                          |     | (b) Give reasons for non-participation at each stage                                                                                                                                                         | 8-9   |
|                          |     | (c) Consider use of a flow diagram                                                                                                                                                                           | 8-9   |
| Descriptive data         | 14* | (a) Give characteristics of study participants (eg demographic, clinical, social) and information on exposures and potential confounders                                                                     | 8-9   |
|                          |     | (b) Indicate number of participants with missing data for each variable of interest                                                                                                                          | 8-9   |
|                          |     | (c) <i>Cohort study</i> —Summarise follow-up time (eg, average and total amount)                                                                                                                             |       |
| Outcome data             | 15* | <i>Cohort study</i> —Report numbers of outcome events or summary measures over time                                                                                                                          | 9-10  |
|                          |     | <i>Case-control study</i> —Report numbers in each exposure category, or summary measures of exposure                                                                                                         |       |
|                          |     | <i>Cross-sectional study</i> —Report numbers of outcome events or summary measures                                                                                                                           | 9-10  |
| Main results             | 16  | (a) Give unadjusted estimates and, if applicable, confounder-adjusted estimates and their precision (eg, 95% confidence interval). Make clear which confounders were adjusted for and why they were included | 10-11 |
|                          |     | (b) Report category boundaries when continuous variables were categorized                                                                                                                                    | -     |
|                          |     | (c) If relevant, consider translating estimates of relative risk into absolute risk for a meaningful time period                                                                                             | -     |
| Other analyses           | 17  | Report other analyses done—eg analyses of subgroups and interactions, and sensitivity analyses                                                                                                               | -     |
| <b>Discussion</b>        |     |                                                                                                                                                                                                              |       |
| Key results              | 18  | Summarise key results with reference to study objectives                                                                                                                                                     | 11    |
| Limitations              | 19  | Discuss limitations of the study, taking into account sources of potential bias or imprecision. Discuss both direction and magnitude of any potential bias                                                   | 14-15 |
| Interpretation           | 20  | Give a cautious overall interpretation of results considering objectives, limitations, multiplicity of analyses, results from similar studies, and other relevant evidence                                   | 13-14 |
| Generalisability         | 21  | Discuss the generalisability (external validity) of the study results                                                                                                                                        | 11-13 |
| <b>Other information</b> |     |                                                                                                                                                                                                              |       |
| Funding                  | 22  | Give the source of funding and the role of the funders for the present study and, if applicable, for the original study on which the present article is based                                                | 16    |

\*Give information separately for cases and controls in case-control studies and, if applicable, for exposed and unexposed groups in cohort and cross-sectional studies.

**Note:** An Explanation and Elaboration article discusses each checklist item and gives methodological background and published examples of transparent reporting. The STROBE checklist is best used in conjunction with this article (freely available on the Web sites of PLoS Medicine at <http://www.plosmedicine.org/>, Annals of Internal Medicine at <http://www.annals.org/>, and Epidemiology at <http://www.epidem.com/>). Information on the STROBE Initiative is available at [www.strobe-statement.org](http://www.strobe-statement.org).

# BMJ Open

## Perceived bullying among Norwegian doctors in 1993, 2004 and 2014-15: A study based on cross-sectional and repeated surveys

|                                 |                                                                                                                                |
|---------------------------------|--------------------------------------------------------------------------------------------------------------------------------|
| Journal:                        | <i>BMJ Open</i>                                                                                                                |
| Manuscript ID                   | bmjopen-2017-018161.R1                                                                                                         |
| Article Type:                   | Research                                                                                                                       |
| Date Submitted by the Author:   | 27-Sep-2017                                                                                                                    |
| Complete List of Authors:       | Rosta, Judith; Institute for Studies of the Medical Profession, Aasland, Olaf; Institute for Studies of the Medical Profession |
| <b>Primary Subject Heading</b>: | Epidemiology                                                                                                                   |
| Secondary Subject Heading:      | Mental health                                                                                                                  |
| Keywords:                       | workplace bullying, national samples, doctors, Norway                                                                          |
|                                 |                                                                                                                                |

SCHOLARONE™  
Manuscripts

1  
2  
3 1 Manuscript ID bmjopen-2017-018161

4 2 Original investigation

5 3  
6 4 **Perceived bullying among Norwegian doctors in 1993, 2004 and 2014-15:**

7 5 **A study based on cross-sectional and repeated surveys**

8 6  
9 7  
10 8 **Judith Rosta**, PhD, senior researcher

11 9 **Olaf G. Aasland**, MD, MHA, senior researcher

12 10  
13 11 LEFO - Institute for Studies of the Medical Profession, NMA, Akersgata 2, 0107 Oslo, Norway;

14 12 E-Mail: [judith.rosta@legeforeningen.no](mailto:judith.rosta@legeforeningen.no)

15 13  
16 14 **Abstract:** 192 words

17 15 **Main text:** 3,977 words

18 16 **Number of tables:** 2

19 17 **Number of Figure:** 1

20 18  
21 19 **Corresponding author**

22 20 Name: Judith Rosta

23 21 Institute: LEFO-Institute for Studies of the Medical Profession

24 22 Street: Akersgata 2,

25 23 Postal code: 0107

26 24 City: Oslo

27 25 Country: Norway

28 26 Telephone: +47 23 10 90 62

29 27 Fax: +47 23 10 90 60

30 28 Email: [judith.rosta@legeforeningen.no](mailto:judith.rosta@legeforeningen.no)

1  
2  
3 **Abstract:**

4 **Objectives:** To examine 12-month prevalence of perceived bullying at work for doctors in different  
5  
6  
7  
8  
9  
10 job categories and medical disciplines in 1993, 2004 and 2014-15, and personality traits, work and  
11  
12 health-related factors associated with perceived workplace bullying.

13 **Design:** Cross-sectional questionnaire surveys in 1993, 2004 and 2014-15 where the 2004 and the  
14  
15  
16  
17  
18  
19  
20  
21  
22  
23  
24  
25  
26  
27  
28  
29  
30  
31  
32  
33  
34  
35  
36  
37  
38  
39  
40  
41  
42  
43  
44  
45  
46  
47  
48  
49  
50  
51  
52  
53  
54  
55  
56  
57  
58  
59  
60  
2012-15 samples are partly overlapping.

7 **Setting:** Norway.

8 **Participants:** Response rates were 72.8 % (2,628/3,608) in 1993, 67 % (1,004/1,499) in 2004 and  
9  
10  
11  
12  
13  
14  
15  
16  
17  
18  
19  
20  
21  
22  
23  
24  
25  
26  
27  
28  
29  
30  
31  
32  
33  
34  
35  
36  
37  
38  
39  
40  
41  
42  
43  
44  
45  
46  
47  
48  
49  
50  
51  
52  
53  
54  
55  
56  
57  
58  
59  
60  
78.2 % (1,261/1,612) in 2014-15. 485 doctors responded both in 2004 and 2014-15.

10 **Outcome measure:** Perceived bullying at work from colleagues or superiors at least a few times a  
11  
12  
13  
14  
15  
16  
17  
18  
19  
20  
21  
22  
23  
24  
25  
26  
27  
28  
29  
30  
31  
32  
33  
34  
35  
36  
37  
38  
39  
40  
41  
42  
43  
44  
45  
46  
47  
48  
49  
50  
51  
52  
53  
54  
55  
56  
57  
58  
59  
60  
month during the last year.

12 **Results:** Between the samples from 1993, 2004 and 2014-15 there were no significant differences in  
13  
14  
15  
16  
17  
18  
19  
20  
21  
22  
23  
24  
25  
26  
27  
28  
29  
30  
31  
32  
33  
34  
35  
36  
37  
38  
39  
40  
41  
42  
43  
44  
45  
46  
47  
48  
49  
50  
51  
52  
53  
54  
55  
56  
57  
58  
59  
60  
the prevalence of perceived bullying at work. More senior hospital doctors and surgeons reported  
being bullied. Doctors with higher scores on the personality trait neuroticism were more likely to  
perceive bullying, as were female doctors, doctors with poor job satisfaction and poor self-rated  
health.

17 **Conclusions:** The fraction of doctors who experienced bullying at work was stable over a 20-year  
18  
19  
20  
21  
22  
23  
24  
25  
26  
27  
28  
29  
30  
31  
32  
33  
34  
35  
36  
37  
38  
39  
40  
41  
42  
43  
44  
45  
46  
47  
48  
49  
50  
51  
52  
53  
54  
55  
56  
57  
58  
59  
60  
period. Psychological, psychosocial and cultural factors are predictors of perceived bullying.



1  
2  
3  
4  
5  
6  
7  
8  
9  
10  
11  
12  
13  
14  
15  
16  
17  
18  
19  
20  
21  
22  
23  
24  
25  
26  
27  
28  
29  
30  
31  
32  
33  
34  
35  
36  
37  
38  
39  
40  
41  
42  
43  
44  
45  
46  
47  
48  
49  
50  
51  
52  
53  
54  
55  
56  
57  
58  
59  
60

1 **Strengths and limitations of the study**

- 2 - The study describes the prevalence of perceived bullying at work among doctors over a 20-year
- 3 period.
- 4 - The data allow for generalisation to the whole doctor population in Norway.
- 5 - Analyses are based on self-reported questionnaire data with the possibility of both over- and
- 6 underestimation.

For peer review only

## 1 INTRODUCTION

2 The negative effects of workplace bullying on both the individual and the organisational level are well  
3 documented. Bullying is often associated with suboptimal health and poor job satisfaction, as well as  
4 frequent job change and increased absenteeism.<sup>1-3</sup> It is also shown that poor health and low job  
5 satisfaction of doctors may affect patient safety and treatment outcomes.<sup>4</sup> Despite these negative  
6 effects, work place bullying among doctors has not been well studied in Norway.

7  
8 International variations in the prevalence of workplace bullying are large. On average, 5 % of the  
9 respondents in the 6<sup>th</sup> European Working Condition Survey 2015 comprising all the EU-28 countries  
10 reported being subjected to bullying or harassment during the last 12 months.<sup>5</sup> Norway was below the  
11 EU average.<sup>6</sup> In national studies in Norway, 2-3 % of employees had been bullied at work at least once  
12 a month, with no significant differences within age or gender. Between occupational groups, service-  
13 related occupations (waiters, craftspersons, military, police, health- and social care) experience  
14 bullying more than average.<sup>7,8</sup>

15  
16 In cross-sectional studies from Europe,<sup>9-13</sup> USA<sup>14-16</sup> and Australia,<sup>17</sup> the prevalence of experienced  
17 bullying at work for diverse groups of doctors range from 16 % to 76 % depending on study design  
18 and method of assessment. A cross-national comparison between four European university hospitals in  
19 2004-2005 showed lower prevalence of degrading experiences including bullying at the workplace  
20 during the previous six months for doctors in Trondheim /Norway (10.5 %), than in  
21 Reykjavik/Iceland (12.7 %), in Stockholm/Sweden (13.8 %) and in Padova/Italy (20.2 %).<sup>18</sup>

22  
23 According to the work environmental hypothesis, poor psychosocial conditions like dissatisfaction,  
24 stress, or high levels of conflict play important roles in generating workplace bullying.<sup>19</sup> Associations  
25 between individual personality traits and workplace bullying are also documented, but a cause-and-  
26 effect relationship is complex.<sup>20</sup>

27

1  
2  
3 1 In Norway, many studies, including hospital staff<sup>21</sup> and nurses,<sup>2</sup> have addressed bullying at the  
4  
5 2 workplace, but none have examined the experience of doctors based on a nationwide representative  
6  
7 3 dataset over a 20-years period.  
8  
9 4

10  
11 5 Since 1993 the Institute for Studies of the Medical Profession (LEFO) has regularly surveyed a  
12  
13 6 representative sample of active doctors in Norway (legeforsk.org). The surveys in 1993, 2004 and  
14  
15 7 2014-15 included identical questions on perceived bullying at work. It is therefore possible to reliably  
16  
17 8 describe changes during this period.  
18  
19 9

20  
21 10 In this article we focus on the prevalence of perceived bullying at work for Norwegian doctors in  
22  
23 11 various types of job and for hospital doctors practising in different medical disciplines in 1993, 2004  
24  
25 12 and 2014-15. We also investigate to what extent being bullied is associated with other work- and  
26  
27 13 health related factors. In addition we explore the possible association between perceived bullying and  
28  
29 14 two major personality traits: introversion-extraversion and neuroticism.  
30  
31 15

32  
33 16

## 34 35 17 **MATERIAL AND METHODS**

### 36 37 18 **Design and participants**

38  
39 19 In Norway, doctors' health and working conditions have been followed since 1992 by the Institute for  
40  
41 20 Studies of the Medical Profession through a comprehensive research program.  
42  
43 21

44  
45 22 In 1993, a random sample of 9,266 active doctors in Norway were invited to take part in a postal  
46  
47 23 survey on doctors' health, working conditions and quality of life, and 6,672 (72 %) agreed. From a  
48  
49 24 pool of 16 different questionnaires, each doctor received four, one basic to all, and the three others  
50  
51 25 with different themes, randomly distributed according to a weighted system. The intention was to  
52  
53 26 achieve better statistical power through a random pattern of missing responses in the total database.<sup>22</sup>

54  
55  
56 27 See Aasland et al<sup>23</sup> for a detailed description of this overlapping questionnaire design. The data used in  
57  
58  
59  
60

1 this article are from a representative subsample of 3,608 doctors who received a questionnaire about  
2 organisation of work and work environment including item on perceived bullying at work.

3  
4 An additional randomly selected group of 2,000 doctors were invited to participate in a longitudinal  
5 study, and 1,272 (64%) agreed.<sup>22 23</sup> Since 1994, this sample has been followed through biannual postal  
6 questionnaires, while retired doctors were successively replaced by younger colleagues. These data  
7 constitute a set of unbalanced panel data,<sup>24</sup> with variation in the number of observations for each  
8 respondent.<sup>25 26</sup> The 2004 questionnaire (n=1,499) and the 2014-15 questionnaire (n=1,612) both  
9 contained the same question on perceived bullying at work as in the 1993 questionnaire.

10  
11 Informed consent was obtained from all participants in the three surveys, as well as an exemption from  
12 specific review of the individual surveys from the Regional Committee for Medical Research Ethics.

## 13 14 15 **Variables**

### 16 *Response variable*

17 Perceived bullying at work was assessed with the question: "Have you during the last year been  
18 subjected to vexation or uncomfortable teasing (bullying) from colleagues or superiors?" Response  
19 categories were: no, yes - a few times a month, yes - about once a week, yes - a few times a week, and  
20 yes - daily or almost daily. For most of the statistical analyses in this article the categories were  
21 collapsed into "no" and "yes" (i.e. from a few times a month to daily or almost daily). This item  
22 corresponds to similar questions used in other surveys on psychosocial working conditions in the  
23 Norwegian working population,<sup>7 22</sup> where it also pertains to last year, and with the additional  
24 explanation that "vexation or uncomfortable teasing" means bullying.<sup>27</sup>

1  
2  
3 1 *Effect variables*

4  
5 2 Numerous associations with workplace bullying have been reported, for example poor mental or  
6  
7 3 physical health, personality traits and poor working conditions. The present study includes the  
8  
9 4 following items:  
10

11  
12  
13 6 *Self-rated health* was measured in 2014-15 by the question "In general, would you say your health is:  
14  
15 7 very good, good, average, poor".  
16

17  
18  
19 9 *Sickness absence* was measured in 2014-15 with a single question: "How many days of sickness  
20  
21 10 absence have you taken during the past 12 months?" The reported number of sickness absence days  
22  
23 11 was recoded into four levels: 0 days, 1 to 3 days, 4 to 99 days, and 100 days or more.<sup>28</sup>  
24  
25 12

26  
27 13 *Job satisfaction* was measured with the "Job Satisfaction Scale" of Warr, Cook and Wall.<sup>29</sup> It includes  
28  
29 14 ten items that scored on a Likert scale from 1 (very dissatisfied) to 7 (very satisfied). The items were  
30  
31 15 added together into a composite mean job satisfaction scale with possible values from 10 to 70.  
32

33  
34  
35 17 Two personality dimensions, *extraversion – introversion* and *neuroticism*, were measured with the  
36  
37 18 "Eysenck Personality Inventory". Each dimension is based on ten yes or no questions, giving a range  
38  
39 19 from 0 to 10.<sup>30</sup> A subset of the members of the repeated surveys had completed the inventory in 2002.  
40  
41 20

42  
43 21 *Group variables*

44  
45 22 *Job categories:*

46  
47 23 1: doctors in hospital management positions (medical superintendent, head of department, chief senior  
48  
49 24 consultant, head of unit, senior consultant, head of section)

50  
51 25 2: senior hospital consultants

52  
53 26 3: specialty registrars

54  
55 27 4: general practitioners

56  
57 28 5: specialists working in private practice  
58  
59  
60

1  
2  
3 1 6: community medical officers (district medical officer, senior district medical, officer, nursing home  
4 medical officer, visiting medical officer, doctor at infant welfare clinic, community general  
5  
6  
7 3 practitioner)

8  
9 4 7: doctors in academia (professor, associate professor, research fellow, and researcher)

10  
11 5 8: doctors in administrative positions (county medical officer, medical advisor, chief medical officer)

12  
13 6 9: other key job categories

14  
15 7

16  
17 8 *Medical disciplines*

18  
19 9 For the purpose of this study, the 45 different disciplines are collapsed into five categories:

20  
21 10 1: general (internal) medicine disciplines (general practice, paediatrics, haematology, endocrinology,  
22 gastroenterology, physical medicine and rehabilitation, geriatrics, cardiology, dermatology, internal  
23  
24 11 medicine, communicable diseases, respiratory medicine, neurology, oncology, nephrology,  
25  
26 12  
27 13 rheumatology)

28  
29 14 2: surgical disciplines (anaesthesiology, paediatric surgery, cardiothoracic and endocrine surgery,  
30  
31 15 obstetrics and gynaecology, gastroenterological surgery, general surgery, vascular surgery,  
32  
33 16 maxillofacial surgery, neurosurgery, orthopaedic surgery, plastic surgery, thoracic surgery, urology,  
34  
35 17 otorhinolaryngology, ophthalmology)

36  
37 18 3: laboratory disciplines (immunology and transfusion medicine, clinical pharmacology, clinical  
38  
39 19 neurophysiology, medical biochemistry, medical genetics, medical microbiology, nuclear medicine,  
40  
41 20 pathology, radiology)

42  
43 21 4: psychiatry (psychiatry, child and adolescent psychiatry, substance abuse and addiction medicine,  
44  
45 22 community medicine)

46  
47 23 5: other

48  
49  
50 24

51  
52 25 Other variables were *Regional Health Authority* (North, Central, West and South-East), *age* and  
53  
54 26 *gender*.

55  
56 27

57  
58 28

## 1 Analysis

2 Using proportions with 95% confidence intervals we explored possible changes over time in the  
3 prevalence of perceived bullying by comparing the three cross-sectional datasets from 1993, 2004 and  
4 2014-15 respectively. We also looked at potential changes among the 485 who responded both in 2004  
5 and 2014-15. General linear models with age and gender as covariates were used to describe the  
6 associations between perceived bullying and personality traits in the cross-sectional data. Based on  
7 cross-sectional data from 2014-15, a logistic regression model was used to assess the simultaneous  
8 effect of gender, age, job satisfaction, self-rated health and sickness absence on perceived bullying.  
9 Units with missing data were excluded. Predictive Analytics Software Statistics 23 was used for the  
10 analyses.

## 13 RESULTS

### 14 Respondents

#### 15 *Representativity and response rates*

16 Both the respondents of the cross-sectional survey in 1993 and the longitudinal surveys in 2004 and  
17 2014-15 were nearly representative of the total doctor work force in terms of age, gender and main job  
18 categories (as described in previous studies).<sup>23 25 26</sup>

19  
20 The response rates were 72.8 % (2,628/3,608) in 1993, 67 % (1,004/1,499) in 2004 and 78.2 %  
21 (1,261/1,612) in 2014-15. The numbers of respondents with data on all variables (perceived bullying,  
22 gender, age, and job category) were 2,439 in 1993, 730 in 2004 and 1,080 in 2014-15. 485 doctors  
23 responded both in 2004 and 2014-15.

24  
25 Subsamples of the longitudinal surveys had completed the Eysenck Personality Inventory in 2002: 614  
26 of 730 respondents in 2004 and 532 of 1,080 in 2014-15. Since personality is regarded a trait, we  
27 combined data from 2002 with 2004 and 2014-15.

28

1 *Gender, age and job characteristics of doctors in the cross-sectional data from 1993, 2004 and 2014-*

2 *15*

3 The proportion of females in our samples increased from 27.9 % (n=680) in 1993 to 31.5 % (n=230)  
4 in 2004 and further to 43.1 % (n=465) in 2014-15. The mean age was 42.2 years (95 % CI 41.8-42.6)  
5 in 1993, 54.3 years (95% CI 53.7-54.9) in 2004 and 48.5 years (95 % CI 47.9-49.2) in 2014-15, when  
6 younger doctors had been included in the sample. The majority of respondents worked full time in  
7 hospitals (data not shown).

8  
9 *Gender, age and job characteristics of doctors in the repeated data from 2004 and 2014-15*

10 Among the 485 doctors who responded both in 2004 and 2014-15, 31.8 % (n=154) were females and  
11 68.2 % (n=331) were males. The mean age was 46.6 years (95 % CI 45.9 to 47.3) in 2004 and 56.8  
12 years (95 % CI 56.1 to 57.5) in 2014-15. In 2004 and 2014-15, about every second doctor worked in  
13 hospitals. The rest were either general practitioners or had other jobs like administration or private  
14 specialist practice (data not shown).

15  
16 **Prevalence of perceived bullying at work in the cross-sectional data from 1993, 2004 and 2014-**  
17 **15**

18 Table 1 shows consistent levels of perceived bullying from colleagues or superiors among all doctors  
19 over the 20-year period.

20  
21 **Group differences in the prevalence of perceived bullying at work in the cross-sectional data**  
22 **from 1993, 2004 and 2014-15**

23 Table 2 shows the prevalence of perceived bullying at work from colleagues or superiors at least a few  
24 times a month within the last 12 months by gender, age groups and main job positions among all  
25 doctors, and by medical disciplines among hospital doctors in 1993, 2004 and 2014-15.

26  
27 There were no significant changes over time among all doctors or within different job positions,  
28 medical disciplines, age groups or females. A significant increase was for males in 2004.



1  
2  
3 1  
4  
5 2 Regarding job positions, the prevalence of perceived bullying at work was higher for senior hospital  
6  
7 3 consultants and for doctors in hospital management positions than for specialty registrars, GPs and  
8  
9 4 specialist in private practice. In 1993, GPs reported significantly lower prevalence of perceived  
10  
11 5 bullying than specialty registrars and senior hospital doctors.  
12  
13 6

14  
15 7 Across medical disciplines in hospital, the highest prevalence of perceived bullying at work was found  
16  
17 8 among doctors in surgery and laboratory disciplines in 1993 and 2004, and in surgery and psychiatry  
18  
19 9 in 2014-15.  
20  
21 10

22  
23 11 Among hospital doctors in 2014-15, no significant differences in perceived bullying were found across  
24  
25 12 the four Regional Health Authorities (data not shown).  
26  
27 13

#### 28 29 14 **Changes in perceived bullying at work in the repeated measures from 2004 and 2014-15**

30  
31 15 Figure 1 illustrates how the prevalence of perceived bullying at work changed from 2004 to 2014-15  
32  
33 16 among the 485 doctors who answered at both points in time. There was a non-significant decrease in  
34  
35 17 perceived bullying at work at least few times a months from 7.2 % (95 % CI 5.2 to 9.9; n=35) in 2004  
36  
37 18 to 5.6 % (95 % CI 3.9 to 8.0; n=27) in 2014-15.  
38  
39 19

#### 40 41 20 **Perceived bullying at work and personality traits in the cross-sectional data**

42  
43 21 To explore the associations between perceived bullying and personality traits we performed  
44  
45 22 multivariate logistic regression analyses for the cross-sectional samples in 2004 (n=614) and 2014-15  
46  
47 23 (n=532). Controlled for gender and age, neuroticism was a significant predictor in the cross-sectional  
48  
49 24 samples from 2004 (OR 1.28, 95 % CI 1.13-1.44) and 2014-15 (1.24, 1.07-1.45). Introversion-  
50  
51 25 extraversion showed no effect (data not shown).  
52  
53 26  
54  
55 27  
56  
57 28  
58  
59  
60

1  
2  
3 1 **Associations between perceived bullying at work and possible effect variables in the cross-**  
4  
5 2 **sectional data from 2014-15**

6  
7 3 Table 3 lists the included effect variables, and summarizes the univariate and multivariate analyses of  
8  
9 4 the variables on perceived bullying at work from colleagues or superiors at least a few times a month  
10  
11 5 within the last year for all doctors. Being female, having lower job satisfaction and lower levels of  
12  
13 6 self-rated health were significant univariate and multivariate predictors.  
14

15  
16  
17 8 **DISCUSSION**

18  
19 9 **Main findings**

20  
21 10 The prevalence of perceived bullying at work did not change significantly neither in the cross-  
22  
23 11 sectional samples from 1993 to 2004 and 2014-15, nor in the repeated measures in 2004 and 2014-15.  
24  
25 12 More senior hospital doctors and doctors in surgery reported being bullied over the study period.  
26  
27 13 Association of perceived bullying at work with self-reported health, job satisfaction and neuroticism  
28  
29 14 was confirmed.  
30

31  
32  
33 16 **Comparison with other studies**

34  
35 17 Differences in methodology regarding data collection, sample characteristics and measurements limit  
36  
37 18 direct cross-national comparisons. The perception of having experienced bullying at work, however,  
38  
39 19 seems to be lower in our sample in Norway (Table 2) compared with residents/fellows in US (48 %),<sup>14</sup>  
40  
41 20 junior doctors in Germany (13-16 %),<sup>12</sup> doctor-researchers in the UK (42-75 %),<sup>9</sup> surgery trainees and  
42  
43 21 consultants in Australia (47 %),<sup>17</sup> GPs in Lithuania (30 %)<sup>11</sup> and Canada (79 %).<sup>16</sup>  
44  
45 22  
46  
47 23 Perceived bullying at work for Norwegian specialty registrars at all three time points was slightly  
48  
49 24 lower than for senior hospital consultants and doctors in hospital management position. The opposite  
50  
51 25 was observed among surgery trainees versus consultant surgeons in Australia, and among doctors in  
52  
53 26 postgraduate positions 1 versus levels 2-8 in hospital settings in the US, while no such differences  
54  
55 27 were found in the UK.<sup>13 14 17</sup> The higher prevalence for doctors in surgery and academic positions is  
56  
57 28 more consistent.<sup>9 13 17 31</sup>  
58  
59  
60

1  
2  
3 1 A study from Germany describes the 12-month prevalence for experienced bullying over time. As  
4  
5 2 opposed to our findings, this study reports a slightly increasing prevalence among junior hospital  
6  
7 3 doctors in Germany, from 12.9 % at baseline in 2004 to 14.9 % one year after baseline, and further to  
8  
9 4 15.9 % three years after baseline.<sup>12</sup>

10  
11 5  
12  
13 6 Our findings add to other Norwegian studies suggesting that workers in the health and social sectors  
14  
15 7 are more at risk for reporting experienced bullying at work.<sup>7,8</sup> In our survey from 1993, 2004 and  
16  
17 8 2014-15, about 6-7 % of doctors reported perceived bullying at work from colleagues or superiors at  
18  
19 9 least a few times a month within the last 12 months, compared with 2-3 % in the general working  
20  
21 10 population in the period 1989-2013.<sup>7,27</sup>

22  
23 11  
24  
25 12 In our cross-sectional data, neuroticism was positively associated with reporting perceived bullying  
26  
27 13 experiences, which is also found in several other studies.<sup>20,32</sup>

28  
29 14  
30  
31 15 In our multivariate model, perceived bullying at work at least few times a month within the last year  
32  
33 16 was associated with both lower level of self-reported health and poorer job satisfaction, but not with  
34  
35 17 sickness absence. These results are in agreement with recent meta-analyses on health- and job-related  
36  
37 18 outcomes of bullying at work.<sup>1,33</sup>

## 38 39 40 41 20 **Explanation of results**

42  
43 21 The work environmental hypothesis emphasises the importance of psychosocial work factors on  
44  
45 22 workplace bullying. It implies that poor psychosocial working conditions characterized by  
46  
47 23 dissatisfaction, stress and unpredictable tasks can lead to conflicts, which in turn may develop into  
48  
49 24 bullying.<sup>19</sup> Workplaces with high levels of conflict between workers were found to have increased risk  
50  
51 25 of bullying.<sup>27</sup> Victims of bullying were also showed to be more dissatisfied with several other  
52  
53 26 psychosocial factors in the work environment.<sup>34</sup> On the other hand, personality traits like neuroticism  
54  
55 27 was associated with the perception of being bullied. Doctors who scored high on neuroticism were  
56  
57 28 also more reactive to stress<sup>35</sup> and more likely to interpret situations as threatening.<sup>20</sup>

1  
2  
3 1 Thus, the lower prevalence of perceived workplace bullying at the population level, and explicitly in  
4  
5 2 the Norwegian medical profession compared with some other countries, can partly be explained by  
6  
7 3 variations in psychosocial working conditions.  
8  
9 4

10 5 Good working environment is part of a work culture in Norway.<sup>36</sup> In the OECD study across 38  
11  
12 6 countries from 2016 on Better Life Index, the average level of life satisfaction was highest in Norway,  
13  
14 7 suggesting strong social cohesion.<sup>37</sup> In the Eurofund study across 28 countries from 2015 on working  
15  
16 8 environment, there was a more positive picture of psychosocial and organizational working conditions  
17  
18 9 in Norway, for example the scores for being "very satisfied or satisfied" in the main job, and being  
19  
20 10 "always or almost all the time" treated fairly at the workplace, were higher in Norway (93 %; 94 %)  
21  
22 11 compared with for example Germany (89 %; 90 %), Sweden (85 %; 87 %), Italy (83 %; 84 %), UK  
23  
24 12 (90 %; 85 %) and Lithuania (83 %; 76 %).<sup>5</sup> In the 2005 European working conditions survey, Norway  
25  
26 13 showed the second highest level of satisfaction.<sup>38</sup> In studies of the medical profession, doctors in  
27  
28 14 Norway, compared with some other countries reported lower stress levels,<sup>39</sup> better work-home  
29  
30 15 balance, lower working time,<sup>26 40</sup> a higher level of job satisfaction<sup>39 41-43</sup> and lower prevalence for self-  
31  
32 16 reports of perceived bullying at work,<sup>18</sup> suggesting a better work atmosphere in Norway.  
33  
34 17

35  
36  
37 18 Differences in cultural and psychosocial environmental factors across occupational groups in Norway  
38  
39 19 may account for variations in perception of experienced bullying. In the 2013 Living Condition  
40  
41 20 Survey of the Norwegian working population, doctors were the occupational group that scored highest  
42  
43 21 on the scales of psychosocial risk factors at work including work-home unbalance, long working  
44  
45 22 weeks, night works, frequent re-organizations at workplace and high effort at work.<sup>7</sup> In a previous  
46  
47 23 nation-wide survey, the medical occupations scored second highest on a scale of conflicts at work.  
48  
49 24 About six of ten doctors reported conflicts both between leader and employees and between  
50  
51 25 employees.<sup>27</sup> Current studies underline the higher workload and lower work-home balance in the  
52  
53 26 doctor work force compared with several occupations in Norway.<sup>25 26</sup> In addition, studies points to the  
54  
55 27 importance of cultural factors such as the traditional hierarchical structures and teaching methods in  
56  
57 28 the medical profession that might influence the development of bullying.<sup>44 45</sup>  
58  
59  
60

1  
2  
3 1  
4  
5 2 Doctors are not a homogenous group. We found that doctors working in public sector hospitals  
6  
7 3 reported workplace bullying more frequently than doctors working as GPs or as private practice  
8  
9 4 specialist. This finding is consistent with a national survey suggesting a higher prevalence of work  
10  
11 5 conflicts in public as opposed to private settings.<sup>27</sup> Previous Norwegian studies have also shown that  
12  
13 6 hospital doctors experience more psychosocial work stress and are less satisfied with several aspects  
14  
15 7 of the job conditions than are GPs and private practice specialists.<sup>28 46</sup>  
16  
17 8  
18  
19 9 The present study documents no significant changes in the perceived bullying at work from 1993 to  
20  
21 10 2004 and further to 2014-15 based on cross-sectional data or the repeated data from 2004 and 2014-  
22  
23 11 15, suggesting stable psychosocial working conditions for Norwegian doctors. Four major health  
24  
25 12 reforms have been implemented over the last 15 years – the GP list patient scheme in 2001, the free  
26  
27 13 choice of hospital in 2001, the hospital ownership reform in 2002 and the primary/secondary health  
28  
29 14 care coordination reform in 2012. These reforms have of course influenced the organisation of  
30  
31 15 doctors' day-to-day practice. One study shows that the perception of professional freedom of speech  
32  
33 16 and professional autonomy among doctors declined from 2000 to 2004.<sup>47</sup> Another study based on data  
34  
35 17 from 2010 shows that 70 % of doctors experience stress in association with perpetual reorganisations  
36  
37 18 of the national health care system, particularly for hospital doctors.<sup>48</sup> These reforms in the health care  
38  
39 19 organisations seem not to be reflected in perceived bullying at work for doctors. Neither do several  
40  
41 20 national anti-bullying initiatives from 2005, nor does the new Working Environment Act from 2006,<sup>49</sup>  
42  
43 21 which also includes specific measures against harassment or other improper conduct at work, seem to  
44  
45 22 have influenced the perception of workplace bullying among doctors. This suggests that the amount of  
46  
47 23 perceived bullying is not particularly sensitive to organisational change or protective legislation.  
48  
49 24 Cultural values and traditions in medicine are probably more important. However, a relatively high  
50  
51 25 prevalence of bullying at work in medicine is documented.<sup>7 8</sup> An interesting study shows that surgeons  
52  
53 26 view intimidation and harassment in the learning environment as both dysfunctional and functional.<sup>45</sup>  
54  
55  
56 27  
57  
58  
59  
60

1  
2  
3 1 Some important environmental factors that directly or indirectly may generate stress in the health care  
4  
5 2 setting did not change during the last two decades. For most doctors in Norway total weekly working  
6  
7 3 hours remained unchanged in the period 1994-2014.<sup>25 26</sup> The satisfaction with various aspects of  
8  
9 4 working conditions, including the amount of responsibility, variation of work, colleagues and fellow  
10  
11 5 workers, opportunities to use own skills, overall job situation, freedom to choose own methods of  
12  
13 6 working, physical work conditions, recognition for good achievements, rate of pay and work hours as  
14  
15 7 measured with the Job Satisfaction Scale<sup>29</sup> remained relatively stable and high among doctors in  
16  
17 8 Norway.<sup>50 51</sup>

18  
19 9  
20  
21 10 A major personality trait like neuroticism is considered stable in adult life. Subjects scoring high on  
22  
23 11 neuroticism are more likely to perceive situations as threatening. Studies indicate an association  
24  
25 12 between neuroticism and perceiving bullying, although the relationship is complex.<sup>20 32</sup> In our sample,  
26  
27 13 neuroticism was significantly associated with perceived bullying from colleagues or supervisors,  
28  
29 14 suggesting that personality traits, at least neuroticism, may have an impact on the subjective  
30  
31 15 experience of workplace bullying.  
32

33 16

### 34 17 **Strengths and limitations**

35  
36  
37 18 The main strength of our study lies first and foremost in the near representative dataset, making the  
38  
39 19 results generalizable to the entire population of doctors in Norway.<sup>23 25 26</sup> Further in the fact that we  
40  
41 20 have data from three different points in time over a period of more than 20 years, including some  
42  
43 21 repeated measures. Similarities in survey methods and comparable items on being subjected to  
44  
45 22 bullying at work are also strengths. The response rates are between 67 % and 78 %, which are higher  
46  
47 23 than for most other surveys of the medical profession.<sup>26</sup> A limitation is that we only have self-reported  
48  
49 24 data, although this is considered a plausible methodology.<sup>7 8</sup> A further limitation is that the prevalence  
50  
51 25 of perceived bullying at work is based on a single item, and does not meet the gold standard of  
52  
53 26 measuring bullying with a global, check-list based measure.<sup>52</sup> However, this practice started after the  
54  
55 27 data collection in 1993 and 2004, and would have been difficult to have incorporated into the survey  
56  
57 28 design in 2014-15. Other specific elements of workplace bullying like how it occurred (verbal or  
58  
59  
60

1  
2  
3 1 written by e-post or social media), who the perpetrators were (superiors, doctor colleagues, other  
4  
5 2 personal, patients, relatives or friends of patients) or how long the bullying lasted might be also useful  
6  
7 3 information, but were not obtainable in the present study.  
8  
9 4

### 5 **Policy implications**

6 Reducing workplace bullying among doctors is important. It can have a positive effect on the doctors`  
7 health, the quality of patient care and the work organisation.<sup>1 3</sup> Specific attention should be paid to  
8 doctors in hospital management position, senior hospital consultants and doctors in academic position,  
9 who reported higher prevalence of perceived bullying at work in 2014-15. Good leadership, social  
10 support and improved work environment combined with active workplace interventions are crucial to  
11 prevent bullying.<sup>19 32 53</sup> Because intimidation and harassment were found to be a part of medical  
12 education, changes in the attitudes towards these negative behaviours are also important.<sup>45</sup> More  
13 recognition and awareness about bullying in medical school and specialist training are instrumental for  
14 improving communication and relationship between colleagues.  
15

1  
2  
3 1 **DECLARATIONS**  
4  
5 2

6  
7 3 **Acknowledgements** The authors wish to thank all doctors who have supported this study by  
8  
9 4 participating in the survey.  
10  
11 5

12  
13 6 **Contributors** JR and OGA designed the study. JR undertook the literature review, did the statistical  
14  
15 7 analysis and wrote the first draft. OGA made critical revisions. Both authors had full access to all of  
16  
17 8 the data (including statistical reports and tables) and are jointly responsible for the integrity of the data  
18  
19 9 and the accuracy of the data analysis.  
20  
21 10

22  
23 11 **Funding** This research received no specific grant from any funding agency in the public,  
24  
25 12 commercial, or not-for-profit sectors.  
26  
27 13

28  
29 14 **Competing interest** None declared.  
30  
31 15

32  
33 16 **Ethics approval** According to the Regional Committee for Medical Research Ethics, the study based  
34  
35 17 on “Norwegian Physician Survey - A bi-annual prospective questionnaire survey to a representative  
36  
37 18 sample of Norwegian physicians” is exempt from review in Norway, cf. §§ 4 of The Act. The project  
38  
39 19 can be implemented without the approval by the Regional Committee for Medical Research Ethics  
40  
41 20 (IRB 0000 1870). Additionally, approval for data protection of the bi-annual prospective survey  
42  
43 21 among Norwegian doctors was obtained from the Norwegian Social Science Data Service (Reference  
44  
45 22 19521).  
46  
47 23

48  
49  
50 24 **Data sharing statement** The authors may be able to provide aggregated data on which the analysis is  
51  
52 25 based, on request. No additional data available.  
53  
54 26



1  
2  
3 **Table 1.** **The 12-month prevalence of perceived bullying at work from colleagues or**  
4  
5 **superiors for Norwegian doctors in the cross-sectional data from 1993, 2004 and**  
6  
7 **2014-15**  
8  
9  
10

|                            | <b>1993</b>  | <b>2004</b> | <b>2014-15</b> |
|----------------------------|--------------|-------------|----------------|
|                            | % (n)        | % (n)       | % (n)          |
| No                         | 94.3 (2,300) | 92.7 (677)  | 93.0 (1,004)   |
| Yes, a few times a month   | 4.5 (109)    | 5.2 (38)    | 5.5 (59)       |
| Yes, about ones a week     | 0.6 (15)     | 1.0 (7)     | 0.6 (7)        |
| Yes, a few times a week    | 0.3 (8)      | 0.8 (6)     | 0.6 (7)        |
| Yes, daily or almost daily | 0.3 (7)      | 0.3 (2)     | 0.3 (3)        |

5

6

**Table 2. Group differences in 12-month prevalence of perceived bullying at work from colleagues or superiors at least few times a month for Norwegian doctors in the cross-sectional data from 1993, 2004 and 2014-15**

|                                           | 1993<br>(n=2,439) |                          | 2004<br>(n=730) |                        | 2014-15<br>(n=1,080) |                           |
|-------------------------------------------|-------------------|--------------------------|-----------------|------------------------|----------------------|---------------------------|
|                                           | n                 | % (95 % CI)              | n               | % (95 % CI)            | n                    | % (95 % CI)               |
| <b>ALL DOCTORS</b>                        | 139               | 5.7 (4.8 to 6.6)         | 53              | 7.3 (5.4 to 9.2)       | 76                   | 7.0 (4.5 to 8.5)          |
| <b>Gender</b>                             |                   |                          |                 |                        |                      |                           |
| Females                                   | 57                | 8.3 (6.5-10.7)           | 11              | 4.8 (3.0-8.4)          | 43                   | 9.2 (6.6-11.8)            |
| Males                                     | 82                | 4.7 (3.8-5.8)            | 42              | 8.4 (6.3-11.2)         | 33                   | 5.4 (3.6-7.2)             |
| <b>Age by years</b>                       |                   |                          |                 |                        |                      |                           |
| 25 to 35                                  | 31                | 5.6 (3.9-7.8)            | 0               | 0.0 (-)                | 11                   | 6.7 (3.8-11.6)            |
| 36 to 45                                  | 56                | 5.8 (4.5-7.5)            | 11              | 10.9 (6.2-18.5)        | 25                   | 8.5 (5.8-12.3)            |
| 46 to 55                                  | 38                | 6.0 (4.4-8.2)            | 16              | 7.7 (4.8-12.1)         | 20                   | 8.1 (5.3-12.1)            |
| 56 to 65                                  | 13                | 5.3 (3.1-8.9)            | 20              | 5.8 (3.8-8.9)          | 19                   | 6.1 (4.0-9.4)             |
| 66 to 69                                  | 1                 | 2.1 (0.4-11.1)           | 6               | 10.2 (4.7-20.5)        | 1                    | 1.6 (0.3-8.3)             |
| <b>Job positions</b>                      |                   |                          |                 |                        |                      |                           |
| Hospital doctors                          |                   |                          |                 |                        |                      |                           |
| Specialty registrars                      | 67                | 7.2 (5.7-9.1)            | 6               | 5.2 (2.4-10.9)         | 11                   | 6.5 (2.8-10.2)            |
| Senior hospital consultants               | 11                | 14.3 (8.2-23.8)          | 19              | 10.2 (6.6-15.4)        | 34                   | 9.7 (6.6-12.8)            |
| Doctors in hospital management positions  | 1                 | 11.1 (2.0-43.5)          | 9               | 9.6 (5.1-17.2)         | 10                   | 9.7 (4.0-15.4)            |
| Community medical officers                | 27                | 5.7 (4.0-8.2)            | 2               | 6.5 (1.8-20.7)         | 0                    | 0.0 (-)                   |
| General practitioners                     | 6                 | 2.4 (1.1-5.2)            | 8               | 4.3 (2.2-8.3)          | 9                    | 4.0 (1.5-6.6)             |
| Specialists in private practice           | 1                 | 9.1 (1.6-37.7)           | 2               | 4.3 (1.2-14.2)         | 0                    | 0.0 (-)                   |
| Doctors in academia positions             | 7                 | 7.3 (3.6-14.3)           | 3               | 11.5 (4.0-29.0)        | 7                    | 11.3 (3.4-19.2)           |
| Doctors in administrative positions       | 1                 | 16.7 (3.0-56.4)          | 1               | 11.1 (2.0-43.5)        | 2                    | 7.1 (-2.4-16.6)           |
| Other                                     | 18                | 3.0 (1.9-4.8)            | 3               | 7.9 (2.7-20.8)         | 3                    | 8.8 (-0.7-18.3)           |
|                                           |                   | <b>1993</b><br>(n=1,014) |                 | <b>2004</b><br>(n=395) |                      | <b>2004-15</b><br>(n=618) |
|                                           | n                 | % (95 % CI)              | n               | % (95 % CI)            | n                    | % (95 % CI)               |
| <b>ALL HOSPITAL DOCTORS<sup>(a)</sup></b> | 79                | 7.8 (6.3-9.6)            | 34              | 8.6 (6.2-11.8)         | 54                   | 8.7 (6.4-10.8)            |
| Internal medicine                         | 15                | 4.9 (3.0-8.0)            | 11              | 7.5 (4.2-12.9)         | 18                   | 6.9 (4.4-10.7)            |
| Laboratory medicine                       | 5                 | 7.9 (3.4-17.3)           | 5               | 8.9 (3.9-19.3)         | 6                    | 8.5 (3.9-17.2)            |
| Surgery                                   | 25                | 11.1 (7.6-15.9)          | 13              | 11.7 (7.0-19.0)        | 15                   | 9.3 (5.7-14.8)            |
| Psychiatry                                | 6                 | 5.2 (2.4-10.8)           | 4               | 5.4 (2.1-13.1)         | 12                   | 10.3 (6.0-17.2)           |
| Other                                     | 28                | 9.2 (6.5-13.0)           | 1               | 14.3 (2.6-51.3)        | 3                    | 30.0 (10.8-60.3)          |

(a) Missings for medical disciplines in datasets: n=11 in 1993, n=46 in 2004, n=10 in 2014-15.

**Table 3. List of effect variables, univariate and multivariate analyses of the variables on perceived bullying at work from colleagues or superiors at least a few times a month for all doctors in the cross-sectional data from 2014-15 (n=1,053)**

|                                                     | All<br>% (n) | Univariate analyses |              |         | Logistic regression model |                     |         |
|-----------------------------------------------------|--------------|---------------------|--------------|---------|---------------------------|---------------------|---------|
|                                                     |              | No<br>% (n)         | Yes<br>% (n) | P-value | OR                        | 95 % C.I.<br>for OR | P-value |
| <b>Gender</b>                                       |              |                     |              |         |                           |                     |         |
| Male                                                | 57.6 (607)   | 94.9 (576)          | 5.1 (31)     | 0.009   | 1                         |                     |         |
| Female                                              | 42.4 (446)   | 90.6 (404)          | 9.4 (42)     |         | 2.02                      | 1.18-3.47           | 0.010   |
| <b>Age by years (mean)</b>                          | 49.0 (1.053) | 49.2 (980)          | 47.0 (73)    | 0.112   | 0.99                      | 0.97-1.02           | 0.625   |
| <b>Job satisfaction (mean, range from 10 to 70)</b> | 53.0 (1.053) | 53.6 (980)          | 44.9 (73)    | <0.000  | 0.92                      | 0.90-0.94           | <0.000  |
| <b>Self-rated health</b>                            |              |                     |              |         |                           |                     |         |
| Very good                                           | 44.3 (467)   | 96.6 (451)          | 3.4 (16)     | <0.000  | 1                         | -                   | 0.010   |
| Good                                                | 45.9 (483)   | 91.7 (443)          | 8.3 (40)     |         | 3.50                      | 1.49-8.25           | 0.004   |
| Average or poor <sup>(a)</sup>                      | 9.8 (103)    | 83.5 (86)           | 16.5 (17)    |         | 2.29                      | 1.21-4.33           | 0.011   |
| <b>Sickness absence</b>                             |              |                     |              |         |                           |                     |         |
| 0 day                                               | 46.6 (491)   | 95.1(467)           | 4.9 (24)     | 0.053   | 1                         | -                   | 0.967   |
| 1 to 3 days                                         | 28.2 (297)   | 92.6 (275)          | 7.4 (22)     |         | 1.17                      | 0.62-2.22           | 0.629   |
| 4 to 99 days                                        | 23.5 (247)   | 89.9 (222)          | 10.1 (25)    |         | 1.12                      | 0.57-2.18           | 0.744   |
| 100 days or more                                    | 1.7 (18)     | 88.9 (16)           | 11.1 (2)     |         | 0.98                      | 0.18-5.28           | 0.977   |

(a) Categories of self-rated health "average" and "poor" collapsed into "average or poor", because of very low response of "poor" (n=1).

1  
2  
3 1 Figure legend  
4  
5 2

6 3 Figure 1. Changes in perceived bullying at work in the repeated measures from 2004 and 2014-  
7 4 15 (n=485).  
8  
9 5  
10 6  
11 7  
12 8

13  
14  
15  
16  
17  
18  
19  
20  
21  
22  
23  
24  
25  
26  
27  
28  
29  
30  
31  
32  
33  
34  
35  
36  
37  
38  
39  
40  
41  
42  
43  
44  
45  
46  
47  
48  
49  
50  
51  
52  
53  
54  
55  
56  
57  
58  
59  
60

For peer review only

1  
2  
3  
4  
5  
6  
7  
8  
9  
10  
11  
12  
13  
14  
15  
16  
17  
18  
19  
20  
21  
22  
23  
24  
25  
26  
27  
28  
29  
30  
31  
32  
33  
34  
35  
36  
37  
38  
39  
40  
41  
42  
43  
44  
45  
46  
47  
48  
49  
50  
51  
52  
53  
54  
55  
56  
57  
58  
59  
60  
**REFERENCES**

1. Birkeland Nielsen M, Magerøy N, Gjerstad J, et al. Workplace bullying and subsequent health problems. *Tidsskr nor legefören* 2014;134(12):1233-8.
2. Reknes I, Pallesen S, Magerøy N, et al. Exposure to bullying behaviors as a predictor of mental health problems among Norwegian nurses: results from the prospective SUSSH-survey. *Int J Nurs Stud* 2014;51(3):479-87.
3. Ariza-Montes A, Muniz NM, Montero-Simó MJ, et al. Workplace bullying among healthcare workers. *Int J Environ Res Public Health* 2013;10(8):3121-39.
4. Wallace JE, Lemaire JB, Ghali WA. Physician wellness: a missing quality indicator. *Lancet* 2009;374(9702):1714-21.
5. Eurofound. Sixth European Working Conditions Survey. Luxembourg: Publications Office of the European Union, 2016.
6. Eurofound. Violence and harassment in European workplaces: Causes, impacts and policies. Dublin: Publications Office of the European Union, 2015.
7. Statistics Norway. Arbeidsmiljø, levekårsundersøkelsen, 2013 [Working environment, survey on living conditions 2013]. <https://www.ssb.no/arbeid-og-lonn/statistikker/arbmiljo/hvert-3-aar/2014-07-03> (accessed 7 September 2017).
8. Aagestad C, Tynes T, Sterud T, et al. Faktabok om arbeidsmiljø og helse [Factbook on working environment and health]. Oslo: STAMI-rapport, 2015.
9. Stebbing J, Mandalia S, Portsmouth S, et al. A questionnaire survey of stress and bullying in doctors undertaking research. *Postgraduate Medical Journal* 2004;80:93-6.
10. Pranjić N, Males-Bilić L, Beganlić A, et al. Mobbing, stress, and work ability index among physicians in Bosnia and Herzegovina: survey study. *Croat Med J* 2006; 47(5):750-8.
11. Malinauskiene V, Einarsen S. Workplace bullying and post-traumatic stress symptoms among family physicians in Lithuania: an occupation and region specific approach. *Int J Occup Med Environ Health* 2014;27(6):919-32.
12. Loerbroks A, Weigl M, Li J, et al. Workplace bullying and depressive symptoms: a prospective study among junior physicians in Germany. *J Psychosom Res* 2015;78(2):168-72.
13. Quine L. Workplace bullying in junior doctors: questionnaire survey. *BMJ* 2002(324):878-9.
14. Chadaga A, Villines D., Krikorian A. Bullying in the American Graduate Medical Education System: A National Cross-Sectional Survey. *PLoS One* 2016;11(3):e0150246.
15. Rouse L, Gallagher-Garza S., Gebhard RE., et al. Workplace Bullying Among Family Physicians: A Gender Focused Study. *J Womens Health (Larchmt)* 2016(9):882-8.
16. Miedema B, Hamilton R, Lambert-Lanning A, et al. Prevalence of abusive encounters in the workplace of family physicians: a minor, major, or severe problem? *Can Fam Physician* 2010;56(3):e101-8.
17. Ling M, Young C, Shepherd H, et al. Workplace Bullying in Surgery. *World J Surg* 2016;40(11):2560-66.
18. Andersen GR, Aasland OG, Fridner A, et al. Harassment among university hospital physicians in four European cities. Results from a cross-sectional study in Norway, Sweden, Iceland and Italy (the HOUPE study). *Work* 2010;37(1):99-110.
19. Hauge L, Skogstad A, Einarsen S. Relationships between stressful work environments and bullying: Results of a large representative study. *Work and stress* 2007;21(3):220-42.
20. Birkeland Nielsen M, Glasø L, Einarsen S. Exposure to workplace harassment and the Five Factor Model of personality: A meta analysis. *Personality and Individual Differences* 2017;104(4):195-206.
21. Eriksen G, Nygren I, Floyd Webster R. Bullying Among Hospital Staff : Use of Psychometric Triage to Identify Intervention Priorities. *E-Journal of Applied Psychology* 2011;17(2):26-31.
22. Aasland OG, Falkum E. Legekårsundersøkelsen [Survey on doctors` health, living and working conditions]. *Tidsskr nor legefören* 1994;114(26):3052-8.
23. Aasland OG, Olff M, Falkum E, et al. Health complaints and job stress in Norwegian physicians: the use of an overlapping questionnaire design. *Social Science and Medicine* 1997;45(11):1615-29.
24. Baltagi BH. *Econometric Analysis of Panel Data*. England: John Wiley and Sons Chichester 2005.

- 1  
2  
3 1 25. Rosta J, Aasland OG. Doctors' working hours and time spent on patient care in the period 1994 -  
4 2 2014. *Tidsskr nor legeforen* 2016;136(16):1355-9.
- 5 3 26. Rosta J, Aasland OG. Weekly working hours for Norwegian hospital doctors since 1994 with  
6 4 special attention to postgraduate training, work-home balance and the European Working  
7 5 Time Directive: a panel study. *BMJ Open* 2014;4(10).
- 8 6 27. Normann T, Rønning E. Konflikter, mobbing, trakassering og vold i arbeidslivet [Conflicts,  
9 7 bullying, harassment and violence in working life]. *Samfunnsspeilet* 2007;4:62-71.
- 10 8 28. Rosta J, Tellnes G, Aasland OG. Differences in sickness absence between self-employed and  
11 9 employed Doctors: a cross-sectional study on National sample of Norwegian Doctors in 2010.  
12 10 *Health Services Research* 2014;49(1):1-8.
- 13 11 29. Warr P, Cook J, Wall T. Scales for the measurement of some work attitudes and aspects of  
14 12 psychological well-being. *Journal of Occupational Psychology* 1979;52(2):129-48.
- 15 13 30. Eysenck HJ, Eysenck SBG. The Eysenck Personality Inventory. London: University of London  
16 14 Press 1964.
- 17 15 31. Cassell M. Bullying in academe: prevalent, significant, and incessant. *Contemporary Issues In*  
18 16 *Education Research* 2011;4(5):33-44.
- 19 17 32. Birkeland Nielsen M, Knardahl S. Is workplace bullying related to the personality traits of  
20 18 victims? A two-year prospective study. *Work and Stress* 2015;29(2):128-49.
- 21 19 33. Birkeland Nielsen M, Einarsen S. Outcomes of exposure to workplace bullying: A meta-analytic  
22 20 review. *Work and Stress* 2012;26(4):309-32.
- 23 21 34. Einarsen S, Glasø L, Birkeland Nielsen M. Mobbing i arbeidslivet: En litteraturoversikt [Bullying i  
24 22 working life: a literature review]. *Tidsskrift for Norsk psykologforening* 2008;45(3):308-17.
- 25 23 35. Tyssen R, Dolatowski FC, Røvik JO, et al. Personality traits and types predict medical school  
26 24 stress: a six-year longitudinal and nationwide study. *Medical Education* 2007;41(8):781-87.
- 27 25 36. The Norwegian Directorate of Integration and Diversity. New i Norway: Work culture.  
28 26 [http://www.nyinorge.no/en/Ny-i-Norge-velg-sprak/New-in-Norway/Useful-information/Facts-](http://www.nyinorge.no/en/Ny-i-Norge-velg-sprak/New-in-Norway/Useful-information/Facts-about-Norway1/Work-culture/)  
29 27 [about-Norway1/Work-culture/](http://www.nyinorge.no/en/Ny-i-Norge-velg-sprak/New-in-Norway/Useful-information/Facts-about-Norway1/Work-culture/): (accessed 4 September 2017).
- 30 28 37. OECD. Better Life Index 2016: Life satisfaction 2016.  
31 29 <http://www.oecdbetterlifeindex.org/topics/life-satisfaction/> (accessed 4 May 2017).
- 32 30 38. Eurofound. Fourth European Working Conditions Survey. Luxembourg: Office for Official  
33 31 Publications of the European Communities, 2007.
- 34 32 39. Voltmer E, Rosta J, Siegrist J, et al. Job stress and job satisfaction of physicians in private practice:  
35 33 comparison of German and Norwegian physicians. *International Archives of Occupational*  
36 34 *and Environmental Health* 2012;85(7):819-28.
- 37 35 40. Rosta J, Aasland OG. Work hours and self rated health of hospital doctors in Norway and  
38 36 Germany. A comparative study on national samples. *BMC Health Serv Res* 2011;11:40.
- 39 37 41. Rosta J, Nylenna M, Aasland OG. Job satisfaction among hospital doctors in Norway and  
40 38 Germany. A comparative study on national samples. *Scandinavian Journal of Public Health*  
41 39 2009;37(5):503-8.
- 42 40 42. Tyssen R, Palmer KS, Solberg IB, et al. Physicians' perceptions of quality of care, professional  
43 41 autonomy, and job satisfaction in Canada, Norway, and the United States. *BMC Health*  
44 42 *Services Research* 2013;13(1):516. doi: 10.1186/1472-6963-13-516
- 45 43 43. Solberg IB, Tomasson K, Aasland O, et al. The impact of economic factors on migration  
46 44 considerations among Icelandic specialist doctors: a cross-sectional study. *BMC Health Serv*  
47 45 *Res* 2013;13.
- 48 46 44. Hoosen I, Callaghan R. A survey of workplace bullying of psychiatric trainees in the West  
49 47 Midlands. *Psychiatric Bulletin* 2004;28:225-27.
- 50 48 45. Musselman LJ, MacRae HM, Reznick RK, et al. 'You learn better under the gun': intimidation and  
51 49 harassment in surgical education. *Medical Education* 2005;39(9):926-34.
- 52 50 46. Aasland OG, Rosta J, Nylenna M. Healthcare reforms and job satisfaction among doctors in  
53 51 Norway. *Scand J Public Health* 2010;38.
- 54 52 47. Førde R, Aasland OG. Moral distress among Norwegian doctors. *J Med Ethics* 2008;34 .
- 55 53 48. Førde R, Aasland OG. Moralsk stress og faglig yringsfrihet blant leger [Moral distress and  
56 54 professional freedom of speech among doctors]. *Tidsskr nor legeforen* 2013;12-13(133):1310-  
57 55 13.

- 1  
2  
3 1 49. Arbeidsmiljøloven [Working Environment Act].  
4 2 <http://www.arbeidstilsynet.no/binfil/download2.php?tid=92156> (accessed 4 September 2017).  
5 3 50. Aasland OG, Rosta J, Nylenna M. Healthcare reforms and job satisfaction among doctors in  
6 4 Norway. *Scandinavian Journal of Public Health* 2010;38(3):253-8.  
7 5 51. Rosta J, Aasland O, Nylenna M. Changes in subjective well-being among Norwegian doctors from  
8 6 2002 to 2012: a panel study. *European Journal of Public Health* 2014(supplement 1):90.  
9 7 52. Birkeland Nielsen M, Notelaers G, Einarsen S. Measuring Exposure to Workplace Bullying: CRC  
10 8 Press 2010:149-174.  
11 9 53. Einarsen S, Aasland MS, Skogstad A. Destructive leadership behaviour: A definition and  
12 10 conceptual model. *The Leadership Quarterly* 2007;18(3):207-16.

13  
14  
15  
16  
17  
18  
19  
20  
21  
22  
23  
24  
25  
26  
27  
28  
29  
30  
31  
32  
33  
34  
35  
36  
37  
38  
39  
40  
41  
42  
43  
44  
45  
46  
47  
48  
49  
50  
51  
52  
53  
54  
55  
56  
57  
58  
59  
60

For peer review only

1  
2  
3  
4  
5  
6  
7  
8  
9  
10  
11  
12  
13  
14  
15  
16  
17  
18  
19  
20  
21  
22  
23  
24  
25  
26  
27  
28  
29  
30  
31  
32  
33  
34  
35  
36  
37  
38  
39  
40  
41  
42  
43  
44  
45  
46  
47  
48  
49  
50  
51  
52  
53  
54  
55  
56  
57  
58  
59  
60

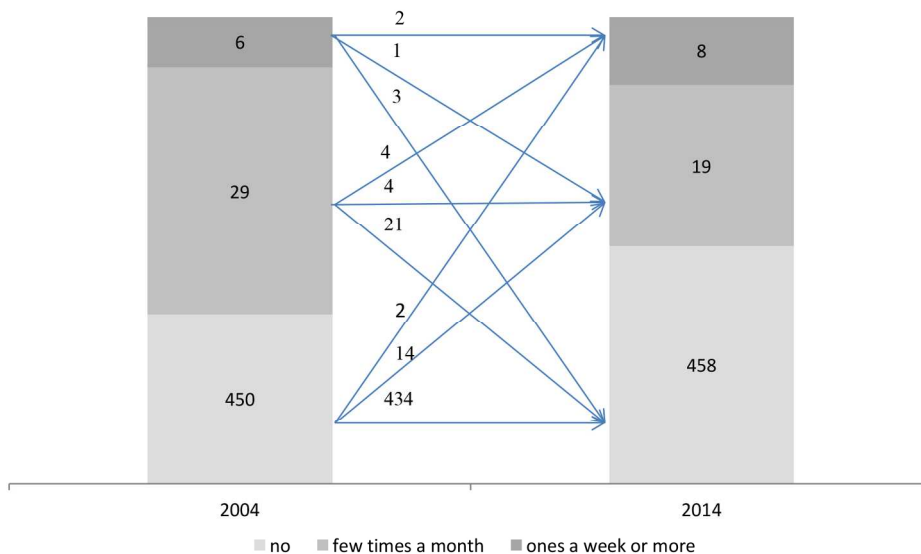

Figure 1. Changes in perceived bullying at work in the repeated measures from 2004 and 2014-15 (n=485)

178x122mm (300 x 300 DPI)

View only



**STROBE 2007 (v4) checklist of items to be included in reports of observational studies in epidemiology\***  
**Checklist for cohort, case-control, and cross-sectional studies (combined)**

| Section/Topic             | Item # | Recommendation                                                                                                                                                                                                                                                                                                                                                                                                                                                         | Reported on page # |
|---------------------------|--------|------------------------------------------------------------------------------------------------------------------------------------------------------------------------------------------------------------------------------------------------------------------------------------------------------------------------------------------------------------------------------------------------------------------------------------------------------------------------|--------------------|
| Title and abstract        | 1      | (a) Indicate the study’s design with a commonly used term in the title or the abstract                                                                                                                                                                                                                                                                                                                                                                                 | 1                  |
|                           |        | (b) Provide in the abstract an informative and balanced summary of what was done and what was found                                                                                                                                                                                                                                                                                                                                                                    | 2                  |
| <b>Introduction</b>       |        |                                                                                                                                                                                                                                                                                                                                                                                                                                                                        |                    |
| Background/rationale      | 2      | Explain the scientific background and rationale for the investigation being reported                                                                                                                                                                                                                                                                                                                                                                                   | 4-5                |
| Objectives                | 3      | State specific objectives, including any pre-specified hypotheses                                                                                                                                                                                                                                                                                                                                                                                                      | 5                  |
| <b>Methods</b>            |        |                                                                                                                                                                                                                                                                                                                                                                                                                                                                        |                    |
| Study design              | 4      | Present key elements of study design early in the paper                                                                                                                                                                                                                                                                                                                                                                                                                | 5                  |
| Setting                   | 5      | Describe the setting, locations, and relevant dates, including periods of recruitment, exposure, follow-up, and data collection                                                                                                                                                                                                                                                                                                                                        | 5-6                |
| Participants              | 6      | (a) <i>Cohort study</i> —Give the eligibility criteria, and the sources and methods of selection of participants. Describe methods of follow-up<br><i>Case-control study</i> —Give the eligibility criteria, and the sources and methods of case ascertainment and control selection. Give the rationale for the choice of cases and controls<br><i>Cross-sectional study</i> —Give the eligibility criteria, and the sources and methods of selection of participants | 5-6                |
|                           |        | (b) <i>Cohort study</i> —For matched studies, give matching criteria and number of exposed and unexposed<br><i>Case-control study</i> —For matched studies, give matching criteria and the number of controls per case                                                                                                                                                                                                                                                 |                    |
| Variables                 | 7      | Clearly define all outcomes, exposures, predictors, potential confounders, and effect modifiers. Give diagnostic criteria, if applicable                                                                                                                                                                                                                                                                                                                               | 6-8                |
| Data sources/ measurement | 8*     | For each variable of interest, give sources of data and details of methods of assessment (measurement). Describe comparability of assessment methods if there is more than one group                                                                                                                                                                                                                                                                                   | 8                  |
| Bias                      | 9      | Describe any efforts to address potential sources of bias                                                                                                                                                                                                                                                                                                                                                                                                              | 5-6                |
| Study size                | 10     | Explain how the study size was arrived at                                                                                                                                                                                                                                                                                                                                                                                                                              | 5-6                |
| Quantitative variables    | 11     | Explain how quantitative variables were handled in the analyses. If applicable, describe which groupings were chosen and why                                                                                                                                                                                                                                                                                                                                           | 6-8                |
| Statistical methods       | 12     | (a) Describe all statistical methods, including those used to control for confounding                                                                                                                                                                                                                                                                                                                                                                                  | 9                  |
|                           |        | (b) Describe any methods used to examine subgroups and interactions                                                                                                                                                                                                                                                                                                                                                                                                    | -                  |
|                           |        | (c) Explain how missing data were addressed                                                                                                                                                                                                                                                                                                                                                                                                                            | 9                  |
|                           |        | (d) <i>Cohort study</i> —If applicable, explain how loss to follow-up was addressed<br><i>Case-control study</i> —If applicable, explain how matching of cases and controls was addressed                                                                                                                                                                                                                                                                              | -                  |

|                          |     |                                                                                                                                                                                                              |       |
|--------------------------|-----|--------------------------------------------------------------------------------------------------------------------------------------------------------------------------------------------------------------|-------|
|                          |     | <i>Cross-sectional study</i> —If applicable, describe analytical methods taking account of sampling strategy                                                                                                 |       |
|                          |     | (e) Describe any sensitivity analyses                                                                                                                                                                        | -     |
| <b>Results</b>           |     |                                                                                                                                                                                                              |       |
| Participants             | 13* | (a) Report numbers of individuals at each stage of study—eg numbers potentially eligible, examined for eligibility, confirmed eligible, included in the study, completing follow-up, and analysed            | 9     |
|                          |     | (b) Give reasons for non-participation at each stage                                                                                                                                                         | -     |
|                          |     | (c) Consider use of a flow diagram                                                                                                                                                                           | -     |
| Descriptive data         | 14* | (a) Give characteristics of study participants (eg demographic, clinical, social) and information on exposures and potential confounders                                                                     | 10    |
|                          |     | (b) Indicate number of participants with missing data for each variable of interest                                                                                                                          | 9     |
|                          |     | (c) <i>Cohort study</i> —Summarise follow-up time (eg, average and total amount)                                                                                                                             | 9     |
| Outcome data             | 15* | <i>Cohort study</i> —Report numbers of outcome events or summary measures over time                                                                                                                          | 9     |
|                          |     | <i>Case-control study</i> —Report numbers in each exposure category, or summary measures of exposure                                                                                                         |       |
|                          |     | <i>Cross-sectional study</i> —Report numbers of outcome events or summary measures                                                                                                                           | 9     |
| Main results             | 16  | (a) Give unadjusted estimates and, if applicable, confounder-adjusted estimates and their precision (eg, 95% confidence interval). Make clear which confounders were adjusted for and why they were included | 12    |
|                          |     | (b) Report category boundaries when continuous variables were categorized                                                                                                                                    | -     |
|                          |     | (c) If relevant, consider translating estimates of relative risk into absolute risk for a meaningful time period                                                                                             | -     |
| Other analyses           | 17  | Report other analyses done—eg analyses of subgroups and interactions, and sensitivity analyses                                                                                                               | -     |
| <b>Discussion</b>        |     |                                                                                                                                                                                                              |       |
| Key results              | 18  | Summarise key results with reference to study objectives                                                                                                                                                     | 13    |
| Limitations              | 19  | Discuss limitations of the study, taking into account sources of potential bias or imprecision. Discuss both direction and magnitude of any potential bias                                                   | 16-17 |
| Interpretation           | 20  | Give a cautious overall interpretation of results considering objectives, limitations, multiplicity of analyses, results from similar studies, and other relevant evidence                                   | 13-16 |
| Generalisability         | 21  | Discuss the generalisability (external validity) of the study results                                                                                                                                        | 12-13 |
| <b>Other information</b> |     |                                                                                                                                                                                                              |       |
| Funding                  | 22  | Give the source of funding and the role of the funders for the present study and, if applicable, for the original study on which the present article is based                                                | 18    |

\*Give information separately for cases and controls in case-control studies and, if applicable, for exposed and unexposed groups in cohort and cross-sectional studies.

**Note:** An Explanation and Elaboration article discusses each checklist item and gives methodological background and published examples of transparent reporting. The STROBE checklist is best used in conjunction with this article (freely available on the Web sites of PLoS Medicine at <http://www.plosmedicine.org/>, Annals of Internal Medicine at <http://www.annals.org/>, and Epidemiology at <http://www.epidem.com/>). Information on the STROBE Initiative is available at [www.strobe-statement.org](http://www.strobe-statement.org).
